# Supplementary material for: Can carbene decorated [FeFe]-hydrogenase model complexes catalytically produce dihydrogen? An insight from theory
Source: Royal Society of Chemistry journal article supplement (doi:10.1039/c9dt01855g), 2019-01-01
Supplement: c9dt01855g1.pdf [file c9dt01855g1.pdf]

# Electronic Supplementary Information

## Can Carbene Decorated [FeFe]-Hydrogenase Model Complexes Catalytically Produce Dihydrogen? An Insight from Theory

Bitupon Borthakur and Ashwini K. Phukan \*

*Department of Chemical Sciences, Tezpur University, Napaam 784028, Assam, India*  
E-mail: [ashwini@tezu.ernet.in](mailto:ashwini@tezu.ernet.in)

### Contents

|                                                                                                                       |        |
|-----------------------------------------------------------------------------------------------------------------------|--------|
| 1. Total charge, multiplicity and $\langle S^2 \rangle$ values for all the complexes considered in the present study. | S1     |
| 2. Cartesian coordinates of all the complexes                                                                         | S2-S34 |

**Table S1:** Total charge, multiplicity and  $\langle S^2 \rangle$  values for all the complexes considered in the present study.

| Complex                                 | Charge | Multiplicity | $\langle S^2 \rangle$ |
|-----------------------------------------|--------|--------------|-----------------------|
| [1] <sup>0</sup>                        | 0      | Singlet      | -                     |
| [1- <i>adtH</i> ] <sup>+</sup>          | 1      | Singlet      | -                     |
| [1- <i>tH</i> ] <sup>+</sup>            | 1      | Singlet      | -                     |
| [1- <i>tH</i> ] <sup>0</sup>            | 0      | Doublet      | 0.7678                |
| [1- <i>tH-adtH</i> ] <sup>+</sup>       | 1      | Doublet      | 0.7676                |
| [1- <b>H<sub>2</sub></b> ] <sup>+</sup> | 1      | Doublet      | 0.7570                |
| [2] <sup>0</sup>                        | 0      | Singlet      | -                     |
| [2- <i>adtH(a)</i> ] <sup>+</sup>       | 1      | Singlet      | -                     |
| [2- <i>adtH(b)</i> ] <sup>+</sup>       | 1      | Singlet      | -                     |
| [2- <i>tH</i> ] <sup>+</sup>            | 1      | Singlet      | -                     |
| [2- <i>tH</i> ] <sup>0</sup>            | 0      | Doublet      | 0.7641                |
| [2- <i>tH-adtH(a)</i> ] <sup>+</sup>    | 1      | Doublet      | 0.7639                |
| [2- <i>tH-adtH(b)</i> ] <sup>+</sup>    | 1      | Doublet      | 0.7642                |
| [2- <b>H<sub>2</sub></b> ] <sup>+</sup> | 1      | Doublet      | 0.7547                |

Cartesian coordinates of all the complexes along with their total energies (T. E. in hartrees) including zero point vibrational correction.

[1]<sup>0</sup>, T. E. = -5069.115539

|    |              |              |              |
|----|--------------|--------------|--------------|
| Fe | -0.008053000 | -2.244981000 | -0.132817000 |
| Fe | 0.011153000  | 0.187703000  | 0.833476000  |
| C  | 0.002236000  | -0.850078000 | -1.224539000 |
| O  | 0.005593000  | -0.407813000 | -2.302458000 |
| C  | -1.161454000 | -2.286280000 | 3.145916000  |
| C  | 1.257164000  | -2.299835000 | 3.097563000  |
| S  | -1.609963000 | -1.488451000 | 1.546372000  |
| S  | 1.649465000  | -1.494618000 | 1.486401000  |
| C  | -1.515455000 | 1.509643000  | 0.174540000  |
| C  | -2.507360000 | 3.662560000  | -0.426588000 |
| C  | 1.495317000  | 1.532460000  | 0.124002000  |
| C  | 2.387593000  | 3.693531000  | -0.586944000 |
| C  | 0.051339000  | 0.695589000  | 2.636795000  |
| O  | 0.082852000  | 0.783901000  | 3.763816000  |
| C  | -0.048439000 | 3.520512000  | -0.189505000 |
| C  | 3.416135000  | 2.606446000  | -0.877602000 |
| C  | -3.509595000 | 2.550084000  | -0.708208000 |
| N  | 0.045165000  | -3.065843000 | 3.199267000  |
| H  | 0.026830000  | -3.779501000 | 2.475922000  |
| C  | 1.222437000  | -3.324228000 | -0.865539000 |
| O  | 1.992588000  | -4.038173000 | -1.310609000 |
| H  | -2.006911000 | -2.931678000 | 3.378767000  |
| H  | -1.106365000 | -1.515297000 | 3.916495000  |
| H  | 2.104167000  | -2.956126000 | 3.290848000  |
| H  | 1.244353000  | -1.532225000 | 3.873370000  |
| C  | -1.284185000 | -3.276744000 | -0.868719000 |
| O  | -2.067622000 | -3.976549000 | -1.310089000 |
| C  | -1.373096000 | 3.018654000  | 0.397847000  |
| C  | 1.317421000  | 3.042398000  | 0.312865000  |
| N  | -2.656543000 | 1.325334000  | -0.434089000 |
| N  | 2.632313000  | 1.364853000  | -0.497399000 |
| C  | 3.275391000  | 0.121059000  | -0.842064000 |
| C  | 4.226737000  | -0.409582000 | 0.016158000  |
| C  | 3.051469000  | -0.451542000 | -2.085833000 |
| C  | 4.950736000  | -1.528599000 | -0.368502000 |
| H  | 4.382816000  | 0.043548000  | 0.985243000  |
| C  | 3.771717000  | -1.575646000 | -2.462145000 |
| H  | 2.320669000  | -0.016269000 | -2.750906000 |
| C  | 4.723870000  | -2.113122000 | -1.606512000 |
| H  | 5.685232000  | -1.947721000 | 0.306332000  |

|   |              |              |              |
|---|--------------|--------------|--------------|
| H | 3.586659000  | -2.030389000 | -3.426320000 |
| H | 5.283921000  | -2.990585000 | -1.902306000 |
| C | -3.247914000 | 0.080395000  | -0.858582000 |
| C | -4.169321000 | -0.554274000 | -0.039425000 |
| C | -3.020112000 | -0.377854000 | -2.148911000 |
| C | -4.861024000 | -1.660641000 | -0.512566000 |
| H | -4.331611000 | -0.188737000 | 0.964415000  |
| C | -3.710634000 | -1.486098000 | -2.615370000 |
| H | -2.310796000 | 0.136918000  | -2.780134000 |
| C | -4.635967000 | -2.124712000 | -1.800433000 |
| H | -5.573156000 | -2.160196000 | 0.130800000  |
| H | -3.525308000 | -1.848291000 | -3.617992000 |
| H | -5.173319000 | -2.989876000 | -2.166210000 |
| C | -1.581543000 | 3.383657000  | 1.874341000  |
| H | -1.393421000 | 4.451322000  | 2.005384000  |
| H | -2.611209000 | 3.187313000  | 2.172102000  |
| H | -0.939904000 | 2.846225000  | 2.559514000  |
| H | 2.843543000  | 4.563010000  | -0.114346000 |
| H | 1.939389000  | 4.024241000  | -1.524578000 |
| H | -2.970462000 | 4.497402000  | 0.098325000  |
| H | -2.117774000 | 4.042103000  | -1.372019000 |
| C | -4.715077000 | 2.567990000  | 0.229336000  |
| H | -5.232599000 | 3.520559000  | 0.111272000  |
| H | -5.417409000 | 1.772040000  | -0.016037000 |
| H | -4.419746000 | 2.461167000  | 1.272505000  |
| C | -3.987430000 | 2.582352000  | -2.154386000 |
| H | -4.713562000 | 1.797255000  | -2.363078000 |
| H | -4.466942000 | 3.546562000  | -2.329579000 |
| H | -3.149796000 | 2.486624000  | -2.846163000 |
| C | 4.680236000  | 2.723249000  | -0.028938000 |
| H | 5.396415000  | 1.940604000  | -0.276886000 |
| H | 5.148348000  | 3.685597000  | -0.238476000 |
| H | 4.462905000  | 2.670661000  | 1.037124000  |
| C | 3.794648000  | 2.578315000  | -2.353568000 |
| H | 4.219858000  | 3.548964000  | -2.612783000 |
| H | 4.537792000  | 1.811514000  | -2.570162000 |
| H | 2.916392000  | 2.411072000  | -2.978422000 |
| H | -0.081544000 | 3.289453000  | -1.259506000 |
| H | -0.055245000 | 4.614733000  | -0.116887000 |
| C | 1.610659000  | 3.427846000  | 1.771147000  |
| H | 2.661033000  | 3.257689000  | 2.005280000  |
| H | 1.405007000  | 4.491954000  | 1.904923000  |
| H | 1.026245000  | 2.880307000  | 2.499116000  |

[1-adtH]<sup>+</sup>, T. E. = -5069.548323

|    |              |              |              |
|----|--------------|--------------|--------------|
| Fe | 0.042365000  | -2.209265000 | -0.280897000 |
| Fe | 0.040416000  | 0.181191000  | 0.836260000  |
| C  | 0.070806000  | -0.789627000 | -1.340703000 |
| O  | 0.121936000  | -0.245129000 | -2.361181000 |
| C  | -0.977378000 | -2.409288000 | 3.026217000  |
| C  | 1.522831000  | -2.379816000 | 2.812586000  |
| S  | -1.501551000 | -1.571327000 | 1.521048000  |
| S  | 1.765630000  | -1.486846000 | 1.267280000  |
| C  | -1.600405000 | 1.427690000  | 0.341911000  |
| C  | -2.844341000 | 3.513231000  | 0.032797000  |
| C  | 1.380444000  | 1.614714000  | 0.031074000  |
| C  | 1.945530000  | 3.744599000  | -1.009018000 |
| C  | 0.215852000  | 0.685646000  | 2.646640000  |
| O  | 0.365806000  | 0.756283000  | 3.761858000  |
| C  | -0.376288000 | 3.503546000  | -0.175801000 |
| C  | 3.049419000  | 2.731960000  | -1.311904000 |
| C  | -3.763137000 | 2.328636000  | -0.228532000 |
| N  | 0.277207000  | -3.206232000 | 2.857039000  |
| H  | 0.206594000  | -3.727538000 | 1.970813000  |
| C  | 1.233963000  | -3.328362000 | -1.030960000 |
| O  | 2.000260000  | -4.023328000 | -1.507089000 |
| H  | -1.755590000 | -3.112666000 | 3.311628000  |
| H  | -0.800539000 | -1.722982000 | 3.852919000  |
| H  | 2.354630000  | -3.068557000 | 2.936690000  |
| H  | 1.484810000  | -1.714232000 | 3.673905000  |
| C  | -1.277648000 | -3.210835000 | -1.048108000 |
| O  | -2.052149000 | -3.909792000 | -1.492078000 |
| C  | -1.547573000 | 2.928662000  | 0.635278000  |
| C  | 1.075476000  | 3.112125000  | 0.094143000  |
| N  | -2.763485000 | 1.184122000  | -0.195379000 |
| N  | 2.509166000  | 1.499530000  | -0.614202000 |
| C  | 3.354624000  | 0.335029000  | -0.676959000 |
| C  | 4.326097000  | 0.193808000  | 0.305979000  |
| C  | 3.276252000  | -0.562500000 | -1.729299000 |
| C  | 5.216008000  | -0.864510000 | 0.245249000  |
| H  | 4.364473000  | 0.906128000  | 1.120640000  |
| C  | 4.166880000  | -1.628383000 | -1.779065000 |
| H  | 2.532034000  | -0.429598000 | -2.501086000 |
| C  | 5.133719000  | -1.780953000 | -0.796273000 |
| H  | 5.968258000  | -0.978359000 | 1.014449000  |
| H  | 4.101953000  | -2.337773000 | -2.592869000 |
| H  | 5.826690000  | -2.610689000 | -0.843827000 |
| C  | -3.236844000 | -0.035726000 | -0.799486000 |
| C  | -4.118017000 | -0.863815000 | -0.119063000 |

|   |              |              |              |
|---|--------------|--------------|--------------|
| C | -2.958947000 | -0.252840000 | -2.142365000 |
| C | -4.724680000 | -1.915333000 | -0.792473000 |
| H | -4.320917000 | -0.690011000 | 0.927689000  |
| C | -3.565584000 | -1.306758000 | -2.808496000 |
| H | -2.286684000 | 0.417031000  | -2.660392000 |
| C | -4.458483000 | -2.131162000 | -2.137087000 |
| H | -5.409507000 | -2.563612000 | -0.262145000 |
| H | -3.347203000 | -1.475285000 | -3.854646000 |
| H | -4.936059000 | -2.950151000 | -2.658454000 |
| C | -1.510380000 | 3.262712000  | 2.129413000  |
| H | -1.493464000 | 4.347959000  | 2.245800000  |
| H | -2.406481000 | 2.887874000  | 2.625897000  |
| H | -0.651216000 | 2.869438000  | 2.654359000  |
| H | 2.354215000  | 4.705939000  | -0.698761000 |
| H | 1.349615000  | 3.912207000  | -1.906376000 |
| H | -3.310939000 | 4.238418000  | 0.697748000  |
| H | -2.629891000 | 4.019186000  | -0.909143000 |
| C | -4.796763000 | 2.126555000  | 0.876781000  |
| H | -5.414650000 | 3.022633000  | 0.941949000  |
| H | -5.452645000 | 1.284506000  | 0.659571000  |
| H | -4.320436000 | 1.961859000  | 1.843587000  |
| C | -4.458154000 | 2.435134000  | -1.578326000 |
| H | -5.121200000 | 1.590565000  | -1.765501000 |
| H | -5.057966000 | 3.346261000  | -1.575289000 |
| H | -3.733537000 | 2.505976000  | -2.390103000 |
| C | 4.418417000  | 3.137328000  | -0.774435000 |
| H | 5.174039000  | 2.387735000  | -1.006783000 |
| H | 4.709110000  | 4.069687000  | -1.259295000 |
| H | 4.410586000  | 3.302286000  | 0.301944000  |
| C | 3.151766000  | 2.448997000  | -2.807462000 |
| H | 3.383368000  | 3.383597000  | -3.319773000 |
| H | 3.943128000  | 1.734004000  | -3.031090000 |
| H | 2.204919000  | 2.067700000  | -3.193189000 |
| H | -0.583391000 | 3.256631000  | -1.222349000 |
| H | -0.436093000 | 4.595861000  | -0.107257000 |
| C | 1.595326000  | 3.591798000  | 1.465454000  |
| H | 2.684014000  | 3.596842000  | 1.472960000  |
| H | 1.248951000  | 4.610304000  | 1.649924000  |
| H | 1.277487000  | 2.967997000  | 2.295098000  |
| H | 0.352206000  | -3.886256000 | 3.617539000  |

**TS1<sub>[1]</sub><sup>0</sup>**, T. E. = -5069.540844

|    |              |              |              |
|----|--------------|--------------|--------------|
| Fe | -0.032842000 | -2.369634000 | -0.117579000 |
| Fe | 0.025032000  | 0.269341000  | 0.823523000  |

|   |              |              |              |
|---|--------------|--------------|--------------|
| C | -0.011725000 | -1.220145000 | -1.529205000 |
| O | 0.044979000  | -0.737227000 | -2.562353000 |
| C | -1.070479000 | -2.362073000 | 2.953908000  |
| C | 1.370405000  | -2.393692000 | 2.788548000  |
| S | -1.574695000 | -1.400847000 | 1.470244000  |
| S | 1.690334000  | -1.419733000 | 1.263008000  |
| C | -1.554406000 | 1.549376000  | 0.265114000  |
| C | -2.726989000 | 3.668633000  | -0.084223000 |
| C | 1.418962000  | 1.658444000  | 0.060258000  |
| C | 2.147378000  | 3.835646000  | -0.759934000 |
| C | 0.184480000  | 0.729595000  | 2.649746000  |
| O | 0.306849000  | 0.749431000  | 3.774374000  |
| C | -0.240485000 | 3.620115000  | -0.102169000 |
| C | 3.225701000  | 2.796901000  | -1.078942000 |
| C | -3.664286000 | 2.507705000  | -0.410988000 |
| N | 0.127923000  | -3.144119000 | 2.693764000  |
| H | 0.036313000  | -3.347084000 | 1.302125000  |
| C | 1.251501000  | -3.555102000 | -0.643609000 |
| O | 2.076449000  | -4.294147000 | -0.903778000 |
| H | -1.895349000 | -3.045977000 | 3.183598000  |
| H | -0.926405000 | -1.684649000 | 3.808206000  |
| H | 2.201726000  | -3.100689000 | 2.890207000  |
| H | 1.367212000  | -1.725872000 | 3.662483000  |
| C | -1.404783000 | -3.512787000 | -0.547186000 |
| O | -2.248759000 | -4.253803000 | -0.722250000 |
| C | -1.485130000 | 3.043267000  | 0.597019000  |
| C | 1.182590000  | 3.162853000  | 0.241097000  |
| N | -2.699394000 | 1.338763000  | -0.333157000 |
| N | 2.557876000  | 1.531985000  | -0.575053000 |
| C | 3.281781000  | 0.308732000  | -0.811538000 |
| C | 4.272070000  | -0.069733000 | 0.095398000  |
| C | 3.054520000  | -0.438078000 | -1.964841000 |
| C | 5.017561000  | -1.221128000 | -0.139869000 |
| H | 4.430872000  | 0.523671000  | 0.996376000  |
| C | 3.788561000  | -1.603968000 | -2.183892000 |
| H | 2.312094000  | -0.104623000 | -2.687187000 |
| C | 4.767778000  | -1.996888000 | -1.272206000 |
| H | 5.783894000  | -1.522955000 | 0.574905000  |
| H | 3.597267000  | -2.200908000 | -3.076604000 |
| H | 5.341406000  | -2.907880000 | -1.447784000 |
| C | -3.156078000 | 0.119068000  | -0.948150000 |
| C | -4.046404000 | -0.725944000 | -0.283312000 |
| C | -2.802241000 | -0.127948000 | -2.272621000 |
| C | -4.555292000 | -1.840714000 | -0.945566000 |
| H | -4.313941000 | -0.524107000 | 0.752423000  |
| C | -3.306795000 | -1.250604000 | -2.927497000 |

|   |              |              |              |
|---|--------------|--------------|--------------|
| H | -2.127937000 | 0.559343000  | -2.783749000 |
| C | -4.185450000 | -2.106098000 | -2.264817000 |
| H | -5.238404000 | -2.511178000 | -0.422892000 |
| H | -3.016144000 | -1.449056000 | -3.959801000 |
| H | -4.582356000 | -2.984406000 | -2.775491000 |
| C | -1.561093000 | 3.328879000  | 2.103895000  |
| H | -1.474270000 | 4.413304000  | 2.265276000  |
| H | -2.531022000 | 3.005473000  | 2.506602000  |
| H | -0.782573000 | 2.847331000  | 2.696603000  |
| H | 2.579281000  | 4.761095000  | -0.355931000 |
| H | 1.609437000  | 4.096834000  | -1.681935000 |
| H | -3.217555000 | 4.414147000  | 0.555020000  |
| H | -2.437057000 | 4.174083000  | -1.016073000 |
| C | -4.769992000 | 2.318548000  | 0.628700000  |
| H | -5.384812000 | 3.228679000  | 0.659194000  |
| H | -5.426835000 | 1.479011000  | 0.364601000  |
| H | -4.355936000 | 2.142510000  | 1.631135000  |
| C | -4.272174000 | 2.639874000  | -1.803181000 |
| H | -4.939583000 | 1.800560000  | -2.041220000 |
| H | -4.862223000 | 3.566912000  | -1.831151000 |
| H | -3.491261000 | 2.707329000  | -2.573702000 |
| C | 4.552933000  | 3.048030000  | -0.361860000 |
| H | 5.297506000  | 2.283641000  | -0.620730000 |
| H | 4.942149000  | 4.021589000  | -0.690088000 |
| H | 4.439778000  | 3.074741000  | 0.729676000  |
| C | 3.471086000  | 2.684866000  | -2.582361000 |
| H | 3.822801000  | 3.659474000  | -2.949294000 |
| H | 4.238321000  | 1.934370000  | -2.816505000 |
| H | 2.543455000  | 2.430590000  | -3.114955000 |
| H | -0.381579000 | 3.434100000  | -1.179983000 |
| H | -0.270965000 | 4.717237000  | 0.019556000  |
| C | 1.618384000  | 3.541053000  | 1.671262000  |
| H | 2.703296000  | 3.422195000  | 1.786164000  |
| H | 1.369532000  | 4.596142000  | 1.856847000  |
| H | 1.146896000  | 2.940950000  | 2.453376000  |
| H | 0.153517000  | -4.009549000 | 3.235457000  |

[1-*rH*]<sup>+</sup>, T. E. = -5069.560363

|    |              |              |              |
|----|--------------|--------------|--------------|
| Fe | -0.000026000 | -2.397525000 | 0.009907000  |
| Fe | 0.000015000  | 0.218637000  | 0.872585000  |
| C  | 0.000037000  | -0.941489000 | -1.290741000 |
| O  | 0.000090000  | -0.470786000 | -2.312696000 |
| C  | -1.213842000 | -2.200821000 | 3.175256000  |
| C  | 1.213766000  | -2.200877000 | 3.175262000  |



|   |              |              |              |
|---|--------------|--------------|--------------|
| S | -1.600401000 | -1.456088000 | 1.517221000  |
| S | 1.600367000  | -1.456152000 | 1.517233000  |
| C | -1.496844000 | 1.545714000  | 0.145940000  |
| C | -2.452113000 | 3.703817000  | -0.475527000 |
| C | 1.496897000  | 1.545692000  | 0.145968000  |
| C | 2.452187000  | 3.703786000  | -0.475497000 |
| C | 0.000043000  | 0.769334000  | 2.677700000  |
| O | 0.000092000  | 0.871278000  | 3.799208000  |
| C | 0.000035000  | 3.555619000  | -0.146161000 |
| C | 3.451958000  | 2.599949000  | -0.798113000 |
| C | -3.451901000 | 2.599990000  | -0.798120000 |
| N | -0.000055000 | -2.933758000 | 3.337944000  |
| H | -0.000073000 | -3.768667000 | 2.765497000  |
| C | 1.383336000  | -3.354948000 | -0.811283000 |
| O | 2.194641000  | -4.039034000 | -1.179671000 |
| H | -2.054779000 | -2.859918000 | 3.377318000  |
| H | -1.242032000 | -1.384357000 | 3.897310000  |
| H | 2.054672000  | -2.860013000 | 3.377324000  |
| H | 1.241992000  | -1.384417000 | 3.897319000  |
| C | -1.383426000 | -3.354894000 | -0.811289000 |
| O | -2.194779000 | -4.038916000 | -1.179690000 |
| C | -1.348968000 | 3.051477000  | 0.385294000  |
| C | 1.349022000  | 3.051457000  | 0.385308000  |
| N | -2.613502000 | 1.367529000  | -0.503122000 |
| N | 2.613559000  | 1.367495000  | -0.503084000 |
| C | 3.197051000  | 0.122181000  | -0.938000000 |
| C | 4.109122000  | -0.529056000 | -0.120048000 |
| C | 2.972929000  | -0.321301000 | -2.235113000 |
| C | 4.784439000  | -1.642733000 | -0.598301000 |
| H | 4.279878000  | -0.167664000 | 0.884023000  |
| C | 3.646163000  | -1.439137000 | -2.706185000 |
| H | 2.295829000  | 0.222500000  | -2.878528000 |
| C | 4.555939000  | -2.097326000 | -1.889424000 |
| H | 5.490284000  | -2.153810000 | 0.042516000  |
| H | 3.468176000  | -1.784637000 | -3.715775000 |
| H | 5.084034000  | -2.966469000 | -2.258594000 |
| C | -3.197036000 | 0.122225000  | -0.938010000 |
| C | -4.109172000 | -0.528934000 | -0.120068000 |
| C | -2.972903000 | -0.321309000 | -2.235104000 |
| C | -4.784538000 | -1.642587000 | -0.598307000 |
| H | -4.279948000 | -0.167493000 | 0.883982000  |
| C | -3.646183000 | -1.439124000 | -2.706161000 |
| H | -2.295743000 | 0.222426000  | -2.878511000 |
| C | -4.556023000 | -2.097234000 | -1.889408000 |
| H | -5.490437000 | -2.153601000 | 0.042502000  |
| H | -3.468182000 | -1.784667000 | -3.715733000 |

|   |              |              |              |
|---|--------------|--------------|--------------|
| H | -5.084160000 | -2.966357000 | -2.258568000 |
| C | -1.613849000 | 3.412554000  | 1.854394000  |
| H | -1.459038000 | 4.485420000  | 1.982955000  |
| H | -2.646113000 | 3.189990000  | 2.122101000  |
| H | -0.978621000 | 2.902697000  | 2.565439000  |
| H | 2.928977000  | 4.537199000  | 0.038403000  |
| H | 2.029055000  | 4.087368000  | -1.404365000 |
| H | -2.928890000 | 4.537240000  | 0.038366000  |
| H | -2.028976000 | 4.087386000  | -1.404399000 |
| C | -4.685576000 | 2.608413000  | 0.101241000  |
| H | -5.202432000 | 3.559247000  | -0.030180000 |
| H | -5.376818000 | 1.811090000  | -0.170317000 |
| H | -4.423945000 | 2.499402000  | 1.152934000  |
| C | -3.881633000 | 2.643597000  | -2.258323000 |
| H | -4.604129000 | 1.863778000  | -2.496732000 |
| H | -4.353307000 | 3.610388000  | -2.438853000 |
| H | -3.023161000 | 2.554714000  | -2.924857000 |
| C | 4.685677000  | 2.608383000  | 0.101188000  |
| H | 5.376920000  | 1.811077000  | -0.170414000 |
| H | 5.202509000  | 3.559227000  | -0.030251000 |
| H | 4.424105000  | 2.499357000  | 1.152893000  |
| C | 3.881627000  | 2.643537000  | -2.258335000 |
| H | 4.353298000  | 3.610323000  | -2.438900000 |
| H | 4.604107000  | 1.863711000  | -2.496766000 |
| H | 3.023123000  | 2.554650000  | -2.924829000 |
| H | 0.000038000  | 3.355657000  | -1.222629000 |
| H | 0.000041000  | 4.646787000  | -0.043153000 |
| C | 1.613864000  | 3.412526000  | 1.854418000  |
| H | 2.646100000  | 3.189900000  | 2.122180000  |
| H | 1.459114000  | 4.485404000  | 1.982958000  |
| H | 0.978563000  | 2.902721000  | 2.565436000  |
| H | -0.000056000 | -3.720735000 | 0.748755000  |

[1- $\tau$ H]<sup>0</sup>, T. E. = -5069.691710

|    |              |              |              |
|----|--------------|--------------|--------------|
| Fe | -0.000070000 | -2.540751000 | 0.024699000  |
| Fe | 0.000055000  | 0.217158000  | 0.784278000  |
| C  | 0.000000000  | -0.715063000 | -1.042871000 |
| O  | 0.000055000  | -0.439854000 | -2.180556000 |
| C  | -1.216584000 | -2.202300000 | 3.179485000  |
| C  | 1.216976000  | -2.202410000 | 3.179272000  |
| S  | -1.629452000 | -1.512529000 | 1.512706000  |
| S  | 1.629590000  | -1.512611000 | 1.512442000  |
| C  | -1.497745000 | 1.562298000  | 0.140181000  |
| C  | -2.451690000 | 3.721303000  | -0.495660000 |

|   |              |              |              |
|---|--------------|--------------|--------------|
| C | 1.497681000  | 1.562387000  | 0.139980000  |
| C | 2.451169000  | 3.721404000  | -0.496460000 |
| C | 0.000268000  | 0.723400000  | 2.652855000  |
| O | 0.000440000  | 0.794554000  | 3.780402000  |
| C | -0.000204000 | 3.568976000  | -0.180279000 |
| C | 3.462561000  | 2.619228000  | -0.789609000 |
| C | -3.462943000 | 2.619014000  | -0.788855000 |
| N | 0.000176000  | -2.951190000 | 3.330719000  |
| H | 0.000083000  | -3.719252000 | 2.666051000  |
| C | 1.347821000  | -3.371260000 | -0.934895000 |
| O | 2.147126000  | -3.995809000 | -1.433940000 |
| H | -2.053860000 | -2.853940000 | 3.424039000  |
| H | -1.215710000 | -1.380216000 | 3.896443000  |
| H | 2.054238000  | -2.854137000 | 3.423643000  |
| H | 1.216318000  | -1.380348000 | 3.896257000  |
| C | -1.348147000 | -3.371123000 | -0.934768000 |
| O | -2.147518000 | -3.995644000 | -1.433741000 |
| C | -1.345378000 | 3.071103000  | 0.360765000  |
| C | 1.345161000  | 3.071210000  | 0.360358000  |
| N | -2.634091000 | 1.387028000  | -0.480860000 |
| N | 2.634018000  | 1.387168000  | -0.481092000 |
| C | 3.235635000  | 0.142145000  | -0.888300000 |
| C | 4.169509000  | -0.466499000 | -0.063152000 |
| C | 3.004273000  | -0.344730000 | -2.167882000 |
| C | 4.873132000  | -1.571990000 | -0.519719000 |
| H | 4.332619000  | -0.080114000 | 0.932914000  |
| C | 3.707656000  | -1.451724000 | -2.618352000 |
| H | 2.284988000  | 0.149402000  | -2.804441000 |
| C | 4.646688000  | -2.062550000 | -1.797679000 |
| H | 5.594744000  | -2.050832000 | 0.128729000  |
| H | 3.521260000  | -1.835009000 | -3.612914000 |
| H | 5.193807000  | -2.926711000 | -2.151157000 |
| C | -3.235509000 | 0.142020000  | -0.888414000 |
| C | -4.169292000 | -0.467025000 | -0.063462000 |
| C | -3.004118000 | -0.344381000 | -2.168174000 |
| C | -4.872784000 | -1.572451000 | -0.520406000 |
| H | -4.332464000 | -0.080984000 | 0.932724000  |
| C | -3.707385000 | -1.451286000 | -2.619031000 |
| H | -2.284894000 | 0.150058000  | -2.804567000 |
| C | -4.646331000 | -2.062510000 | -1.798553000 |
| H | -5.594326000 | -2.051607000 | 0.127888000  |
| H | -3.520973000 | -1.834191000 | -3.613736000 |
| H | -5.193356000 | -2.926609000 | -2.152326000 |
| C | -1.596035000 | 3.434433000  | 1.831687000  |
| H | -1.398080000 | 4.499091000  | 1.972607000  |
| H | -2.636585000 | 3.250168000  | 2.097026000  |

|   |              |              |              |
|---|--------------|--------------|--------------|
| H | -0.982587000 | 2.884994000  | 2.533237000  |
| H | 2.914399000  | 4.568466000  | 0.008554000  |
| H | 2.034438000  | 4.084853000  | -1.436652000 |
| H | -2.914965000 | 4.568164000  | 0.009648000  |
| H | -2.035231000 | 4.085045000  | -1.435861000 |
| C | -4.693369000 | 2.665689000  | 0.114727000  |
| H | -5.195413000 | 3.622623000  | -0.031543000 |
| H | -5.398565000 | 1.874697000  | -0.138734000 |
| H | -4.429337000 | 2.570785000  | 1.167231000  |
| C | -3.902095000 | 2.639465000  | -2.247700000 |
| H | -4.633027000 | 1.861311000  | -2.465631000 |
| H | -4.363911000 | 3.607422000  | -2.447882000 |
| H | -3.047636000 | 2.523716000  | -2.915464000 |
| C | 4.693235000  | 2.666436000  | 0.113607000  |
| H | 5.398530000  | 1.875519000  | -0.139808000 |
| H | 5.195028000  | 3.623433000  | -0.033114000 |
| H | 4.429534000  | 2.571819000  | 1.166219000  |
| C | 3.901294000  | 2.639318000  | -2.248587000 |
| H | 4.362863000  | 3.607303000  | -2.449205000 |
| H | 4.632316000  | 1.861240000  | -2.466484000 |
| H | 3.046661000  | 2.523191000  | -2.916064000 |
| H | -0.000365000 | 3.349441000  | -1.253208000 |
| H | -0.000231000 | 4.662404000  | -0.095637000 |
| C | 1.596251000  | 3.434697000  | 1.831174000  |
| H | 2.636872000  | 3.250438000  | 2.096238000  |
| H | 1.398355000  | 4.499375000  | 1.972026000  |
| H | 0.982987000  | 2.885347000  | 2.532955000  |
| H | -0.000091000 | -3.971063000 | 0.717856000  |

[1-*t*H-*adt*H]<sup>+</sup>, T. E. = -5070.131403

|    |              |              |              |
|----|--------------|--------------|--------------|
| Fe | 0.000371000  | -2.544440000 | 0.015601000  |
| Fe | -0.000174000 | 0.231972000  | 0.783110000  |
| C  | 0.000258000  | -0.709454000 | -1.052566000 |
| O  | 0.000328000  | -0.450240000 | -2.188408000 |
| C  | -1.259057000 | -2.200661000 | 3.106630000  |
| C  | 1.258208000  | -2.199848000 | 3.107321000  |
| S  | -1.646425000 | -1.501399000 | 1.485319000  |
| S  | 1.646181000  | -1.500799000 | 1.486063000  |
| C  | -1.500805000 | 1.579117000  | 0.143367000  |
| C  | -2.450966000 | 3.735855000  | -0.494938000 |
| C  | 1.500747000  | 1.579143000  | 0.143870000  |
| C  | 2.451322000  | 3.735987000  | -0.493588000 |
| C  | -0.001366000 | 0.750308000  | 2.664190000  |
| O  | -0.002368000 | 0.794677000  | 3.790719000  |

|   |              |              |              |
|---|--------------|--------------|--------------|
| C | 0.000116000  | 3.583114000  | -0.179247000 |
| C | 3.464532000  | 2.635222000  | -0.785558000 |
| C | -3.464213000 | 2.635134000  | -0.786920000 |
| N | -0.000177000 | -2.997845000 | 3.136541000  |
| H | 0.000231000  | -3.597620000 | 2.271215000  |
| C | 1.360022000  | -3.373168000 | -0.983147000 |
| O | 2.148789000  | -3.984251000 | -1.503648000 |
| H | -2.060997000 | -2.883272000 | 3.376731000  |
| H | -1.179224000 | -1.434514000 | 3.876076000  |
| H | 2.060406000  | -2.881861000 | 3.378157000  |
| H | 1.177366000  | -1.433538000 | 3.876505000  |
| C | -1.358532000 | -3.373510000 | -0.983885000 |
| O | -2.146907000 | -3.984672000 | -1.504886000 |
| C | -1.344965000 | 3.086740000  | 0.362848000  |
| C | 1.344922000  | 3.086720000  | 0.363575000  |
| N | -2.636458000 | 1.401508000  | -0.474419000 |
| N | 2.636496000  | 1.401592000  | -0.473767000 |
| C | 3.238383000  | 0.155597000  | -0.877393000 |
| C | 4.173829000  | -0.448939000 | -0.050466000 |
| C | 3.007486000  | -0.333915000 | -2.156623000 |
| C | 4.875100000  | -1.557714000 | -0.502895000 |
| H | 4.342256000  | -0.055915000 | 0.942550000  |
| C | 3.711094000  | -1.442118000 | -2.603180000 |
| H | 2.293135000  | 0.161833000  | -2.797680000 |
| C | 4.648334000  | -2.051908000 | -1.779358000 |
| H | 5.599129000  | -2.032769000 | 0.145511000  |
| H | 3.527858000  | -1.826062000 | -3.597953000 |
| H | 5.196817000  | -2.915795000 | -2.131054000 |
| C | -3.238453000 | 0.155413000  | -0.877550000 |
| C | -4.174161000 | -0.448523000 | -0.050483000 |
| C | -3.007278000 | -0.334900000 | -2.156419000 |
| C | -4.875410000 | -1.557518000 | -0.502390000 |
| H | -4.342766000 | -0.054889000 | 0.942266000  |
| C | -3.710847000 | -1.443345000 | -2.602445000 |
| H | -2.292732000 | 0.160392000  | -2.797608000 |
| C | -4.648328000 | -2.052557000 | -1.778472000 |
| H | -5.599636000 | -2.032114000 | 0.146133000  |
| H | -3.527379000 | -1.827936000 | -3.596925000 |
| H | -5.196782000 | -2.916630000 | -2.129759000 |
| C | -1.596350000 | 3.452595000  | 1.833255000  |
| H | -1.396701000 | 4.517033000  | 1.971392000  |
| H | -2.637141000 | 3.270535000  | 2.098567000  |
| H | -0.983435000 | 2.906856000  | 2.538497000  |
| H | 2.913122000  | 4.583605000  | 0.011244000  |
| H | 2.034762000  | 4.098416000  | -1.434003000 |
| H | -2.912861000 | 4.583687000  | 0.009448000  |

|   |              |              |              |
|---|--------------|--------------|--------------|
| H | -2.033992000 | 4.097935000  | -1.435306000 |
| C | -4.695151000 | 2.683884000  | 0.115302000  |
| H | -5.194852000 | 3.641416000  | -0.033778000 |
| H | -5.402008000 | 1.894518000  | -0.138375000 |
| H | -4.433034000 | 2.591424000  | 1.168520000  |
| C | -3.899949000 | 2.649660000  | -2.246477000 |
| H | -4.631532000 | 1.871768000  | -2.462931000 |
| H | -4.360975000 | 3.617061000  | -2.450173000 |
| H | -3.044442000 | 2.532304000  | -2.912491000 |
| C | 4.695146000  | 2.683444000  | 0.117141000  |
| H | 5.402067000  | 1.894194000  | -0.136719000 |
| H | 5.194943000  | 3.641035000  | -0.031226000 |
| H | 4.432650000  | 2.590387000  | 1.170212000  |
| C | 3.900834000  | 2.650239000  | -2.244939000 |
| H | 4.362061000  | 3.617660000  | -2.448091000 |
| H | 4.632404000  | 1.872337000  | -2.461405000 |
| H | 3.045577000  | 2.533244000  | -2.911335000 |
| H | 0.000420000  | 3.362968000  | -1.251816000 |
| H | 0.000095000  | 4.676184000  | -0.095339000 |
| C | 1.595684000  | 3.452236000  | 1.834190000  |
| H | 2.636778000  | 3.271723000  | 2.099338000  |
| H | 1.394329000  | 4.516267000  | 1.972996000  |
| H | 0.983793000  | 2.904999000  | 2.539176000  |
| H | 0.000427000  | -3.971240000 | 0.764973000  |
| H | -0.000220000 | -3.601147000 | 3.960669000  |

**TS2<sub>[1]</sub><sup>0</sup>**, T. E. = -5070.130205

|    |              |              |              |
|----|--------------|--------------|--------------|
| Fe | 0.010019000  | -2.548381000 | 0.132134000  |
| Fe | 0.000490000  | 0.214339000  | 0.796245000  |
| C  | 0.007750000  | -0.764387000 | -1.044391000 |
| O  | 0.012864000  | -0.637830000 | -2.191022000 |
| C  | -1.229467000 | -2.193863000 | 3.168337000  |
| C  | 1.241647000  | -2.187053000 | 3.170148000  |
| S  | -1.650010000 | -1.474429000 | 1.546443000  |
| S  | 1.661138000  | -1.464671000 | 1.549226000  |
| C  | -1.498855000 | 1.558563000  | 0.152450000  |
| C  | -2.484253000 | 3.717686000  | -0.416713000 |
| C  | 1.481636000  | 1.575034000  | 0.140653000  |
| C  | 2.422006000  | 3.744581000  | -0.463701000 |
| C  | -0.000152000 | 0.741220000  | 2.672971000  |
| O  | 0.001171000  | 0.799222000  | 3.798004000  |
| C  | -0.026735000 | 3.585576000  | -0.113505000 |
| C  | 3.428279000  | 2.649712000  | -0.798683000 |
| C  | -3.476037000 | 2.609059000  | -0.748030000 |

|   |              |              |              |
|---|--------------|--------------|--------------|
| N | 0.008254000  | -2.978913000 | 3.153257000  |
| H | 0.010883000  | -3.595739000 | 1.980304000  |
| C | 1.388790000  | -3.343393000 | -0.895453000 |
| O | 2.186538000  | -3.907611000 | -1.450295000 |
| H | -1.171086000 | -1.412370000 | 3.927149000  |
| H | -2.042138000 | -2.867094000 | 3.430368000  |
| H | 1.177980000  | -1.406104000 | 3.929127000  |
| H | 2.057606000  | -2.855916000 | 3.433127000  |
| C | -1.361584000 | -3.348818000 | -0.900592000 |
| O | -2.154703000 | -3.915844000 | -1.459180000 |
| C | -1.366289000 | 3.061051000  | 0.421174000  |
| C | 1.328226000  | 3.077517000  | 0.397097000  |
| N | -2.619424000 | 1.381881000  | -0.490253000 |
| N | 2.601382000  | 1.410075000  | -0.506839000 |
| C | 3.191870000  | 0.172166000  | -0.951423000 |
| C | 2.958613000  | -0.268166000 | -2.248224000 |
| C | 4.815427000  | -1.565854000 | -0.640717000 |
| C | 4.121878000  | -0.469589000 | -0.146658000 |
| H | 2.247650000  | 0.255597000  | -2.871138000 |
| C | 3.654418000  | -1.363358000 | -2.736253000 |
| H | 5.536272000  | -2.069241000 | -0.010465000 |
| C | 4.588085000  | -2.008701000 | -1.935505000 |
| H | 3.469832000  | -1.707847000 | -3.745068000 |
| H | 5.131969000  | -2.861747000 | -2.319261000 |
| H | 4.296236000  | -0.112136000 | 0.858397000  |
| C | -3.182777000 | 0.142863000  | -0.965756000 |
| C | -4.111330000 | -0.533431000 | -0.187766000 |
| C | -2.927721000 | -0.261895000 | -2.269893000 |
| C | -4.781872000 | -1.627500000 | -0.717331000 |
| H | -4.302704000 | -0.204448000 | 0.823691000  |
| C | -3.599790000 | -1.355645000 | -2.793126000 |
| H | -2.218752000 | 0.289189000  | -2.871246000 |
| C | -4.533041000 | -2.034327000 | -2.020028000 |
| H | -5.502071000 | -2.157428000 | -0.108458000 |
| H | -3.398216000 | -1.671715000 | -3.807972000 |
| H | -5.059319000 | -2.885641000 | -2.431158000 |
| C | -1.618145000 | 3.393174000  | 1.898950000  |
| H | -1.481361000 | 4.466485000  | 2.043782000  |
| H | -2.642384000 | 3.147148000  | 2.177262000  |
| H | -0.962624000 | 2.883414000  | 2.591430000  |
| H | 2.894511000  | 4.578762000  | 0.053242000  |
| H | 1.991239000  | 4.130363000  | -1.388203000 |
| H | -2.963804000 | 4.538123000  | 0.115391000  |
| H | -2.074004000 | 4.120032000  | -1.343550000 |
| C | -4.697277000 | 2.586781000  | 0.168326000  |
| H | -5.221525000 | 3.537700000  | 0.070385000  |

|   |              |              |              |
|---|--------------|--------------|--------------|
| H | -5.387952000 | 1.793211000  | -0.115318000 |
| H | -4.420407000 | 2.450016000  | 1.212993000  |
| C | -3.927415000 | 2.677980000  | -2.200786000 |
| H | -4.643184000 | 1.893651000  | -2.445032000 |
| H | -4.413140000 | 3.642408000  | -2.355358000 |
| H | -3.077433000 | 2.612088000  | -2.880597000 |
| C | 4.669731000  | 2.665538000  | 0.090093000  |
| H | 5.367470000  | 1.878272000  | -0.193909000 |
| H | 5.174770000  | 3.623230000  | -0.037983000 |
| H | 4.419150000  | 2.544865000  | 1.143212000  |
| C | 3.846725000  | 2.705381000  | -2.262063000 |
| H | 4.309351000  | 3.676844000  | -2.441447000 |
| H | 4.572963000  | 1.932094000  | -2.510336000 |
| H | 2.983453000  | 2.612343000  | -2.921783000 |
| H | -0.035553000 | 3.404155000  | -1.193085000 |
| H | -0.032022000 | 4.674864000  | 0.009123000  |
| C | 1.605689000  | 3.416472000  | 1.869427000  |
| H | 2.646337000  | 3.211760000  | 2.118112000  |
| H | 1.428934000  | 4.482739000  | 2.023127000  |
| H | 0.992822000  | 2.875243000  | 2.577462000  |
| H | 0.012790000  | -4.006647000 | 1.056868000  |
| H | 0.009563000  | -3.650876000 | 3.916873000  |

[1-H<sub>2</sub>]<sup>+</sup>, T. E. = -5070.161306

|    |              |              |              |
|----|--------------|--------------|--------------|
| Fe | -0.468590000 | -2.834725000 | 0.068450000  |
| Fe | 0.068806000  | 0.224035000  | 0.636695000  |
| C  | -0.014050000 | -0.283178000 | -1.232733000 |
| O  | 0.057527000  | -0.431729000 | -2.344394000 |
| C  | -1.136788000 | -1.890860000 | 3.199318000  |
| C  | 1.260635000  | -2.292718000 | 2.850300000  |
| S  | -1.677505000 | -1.327528000 | 1.539606000  |
| S  | 1.454247000  | -1.782064000 | 1.101091000  |
| C  | -1.391784000 | 1.699359000  | 0.231734000  |
| C  | -2.362148000 | 3.906976000  | -0.123966000 |
| C  | 1.602767000  | 1.538779000  | 0.004726000  |
| C  | 2.493391000  | 3.610715000  | -0.889787000 |
| C  | 0.411352000  | 0.688526000  | 2.466092000  |
| O  | 0.685834000  | 0.845176000  | 3.545143000  |
| C  | 0.101468000  | 3.624697000  | -0.203102000 |
| C  | 3.493585000  | 2.485570000  | -1.152818000 |
| C  | -3.420833000 | 2.840246000  | -0.378401000 |
| N  | -0.041236000 | -2.832266000 | 3.171786000  |
| C  | 0.601044000  | -3.533872000 | -1.291473000 |
| O  | 1.240264000  | -3.915558000 | -2.142115000 |



|   |              |              |              |
|---|--------------|--------------|--------------|
| H | -2.000878000 | -2.400454000 | 3.621460000  |
| H | -0.939479000 | -1.012534000 | 3.822352000  |
| H | 1.993949000  | -3.083876000 | 2.998596000  |
| H | 1.551225000  | -1.451229000 | 3.487915000  |
| C | -2.021805000 | -3.503143000 | -0.735521000 |
| O | -2.926259000 | -3.999991000 | -1.193119000 |
| C | -1.171204000 | 3.178671000  | 0.536775000  |
| C | 1.480853000  | 3.057878000  | 0.132479000  |
| N | -2.566976000 | 1.584173000  | -0.317213000 |
| N | 2.739283000  | 1.298827000  | -0.584282000 |
| C | 3.394348000  | 0.020415000  | -0.698168000 |
| C | 4.282182000  | -0.344851000 | 0.303758000  |
| C | 3.207981000  | -0.782619000 | -1.810621000 |
| C | 4.980555000  | -1.535479000 | 0.197266000  |
| H | 4.403875000  | 0.296137000  | 1.167717000  |
| C | 3.900372000  | -1.984312000 | -1.903272000 |
| H | 2.545394000  | -0.469537000 | -2.605019000 |
| C | 4.785464000  | -2.360098000 | -0.903731000 |
| H | 5.667812000  | -1.825443000 | 0.980755000  |
| H | 3.751354000  | -2.619181000 | -2.766018000 |
| H | 5.326239000  | -3.293724000 | -0.983916000 |
| C | -3.168007000 | 0.408663000  | -0.895588000 |
| C | -4.117101000 | -0.316538000 | -0.187340000 |
| C | -2.924056000 | 0.131874000  | -2.233899000 |
| C | -4.816071000 | -1.329550000 | -0.827187000 |
| H | -4.298318000 | -0.093383000 | 0.853400000  |
| C | -3.617701000 | -0.890834000 | -2.864704000 |
| H | -2.217423000 | 0.737159000  | -2.785636000 |
| C | -4.572127000 | -1.614373000 | -2.163904000 |
| H | -5.551928000 | -1.899069000 | -0.275363000 |
| H | -3.423998000 | -1.105286000 | -3.907105000 |
| H | -5.119644000 | -2.407020000 | -2.656103000 |
| C | -1.188500000 | 3.482654000  | 2.040446000  |
| H | -0.861385000 | 4.511642000  | 2.200641000  |
| H | -2.201703000 | 3.391500000  | 2.429845000  |
| H | -0.559076000 | 2.837123000  | 2.637983000  |
| H | 2.986491000  | 4.510179000  | -0.522925000 |
| H | 1.983123000  | 3.866785000  | -1.818984000 |
| H | -2.744834000 | 4.712613000  | 0.500761000  |
| H | -2.058192000 | 4.342659000  | -1.076462000 |
| C | -4.492405000 | 2.771950000  | 0.706835000  |
| H | -4.994533000 | 3.738020000  | 0.762150000  |
| H | -5.243518000 | 2.018783000  | 0.471093000  |
| H | -4.064697000 | 2.544213000  | 1.682751000  |
| C | -4.074324000 | 3.007898000  | -1.742570000 |
| H | -4.828889000 | 2.244475000  | -1.931131000 |

|   |              |              |              |
|---|--------------|--------------|--------------|
| H | -4.563056000 | 3.982830000  | -1.761073000 |
| H | -3.333205000 | 2.983503000  | -2.542137000 |
| C | 4.839806000  | 2.678670000  | -0.462124000 |
| H | 5.510064000  | 1.843956000  | -0.663922000 |
| H | 5.298693000  | 3.582500000  | -0.863302000 |
| H | 4.742951000  | 2.796910000  | 0.615636000  |
| C | 3.713977000  | 2.268883000  | -2.646097000 |
| H | 4.113743000  | 3.191108000  | -3.069299000 |
| H | 4.427994000  | 1.468626000  | -2.838538000 |
| H | 2.773753000  | 2.039852000  | -3.150376000 |
| H | -0.077263000 | 3.424103000  | -1.264593000 |
| H | 0.166386000  | 4.714635000  | -0.110048000 |
| C | 1.956185000  | 3.445315000  | 1.545563000  |
| H | 2.995339000  | 3.156524000  | 1.695424000  |
| H | 1.886027000  | 4.529322000  | 1.649827000  |
| H | 1.377384000  | 2.998309000  | 2.343536000  |
| H | -0.344268000 | -4.875812000 | 0.917976000  |
| H | 0.003862000  | -3.334341000 | 4.051644000  |
| H | -0.305059000 | -4.442246000 | 1.534844000  |

[2]<sup>0</sup>, T. E. = -5101.950177

|    |              |              |              |
|----|--------------|--------------|--------------|
| C  | 2.312987000  | -0.089744000 | 3.217150000  |
| P  | 2.483675000  | -1.112382000 | 1.721668000  |
| C  | 4.276962000  | -1.040910000 | 1.304723000  |
| C  | 4.544469000  | 0.120731000  | 0.341801000  |
| P  | 3.360761000  | 0.043291000  | -1.062976000 |
| Fe | 1.291085000  | -0.470544000 | -0.161638000 |
| C  | 1.287701000  | -2.197122000 | -0.847822000 |
| O  | 1.282917000  | -3.241197000 | -1.276482000 |
| C  | 4.109131000  | -1.172672000 | -2.197124000 |
| C  | 3.583784000  | 1.610606000  | -1.954466000 |
| S  | 0.051244000  | 0.423179000  | -2.020785000 |
| Fe | -0.372227000 | 1.516177000  | 0.113940000  |
| C  | -1.051412000 | 2.202294000  | 1.643923000  |
| O  | -1.468483000 | 2.603749000  | 2.620769000  |
| S  | -0.817696000 | -0.719212000 | 0.966330000  |
| C  | -1.920620000 | -1.642612000 | -0.203799000 |
| C  | -1.300155000 | -0.796777000 | -2.386176000 |
| C  | 1.342285000  | 1.585351000  | 0.584619000  |
| O  | 2.153164000  | 2.310868000  | 1.033934000  |
| C  | 2.244095000  | -2.798174000 | 2.364601000  |
| H  | 4.367633000  | 1.076910000  | 0.839574000  |
| H  | -1.405945000 | -2.565730000 | -0.473439000 |

|   |              |              |              |
|---|--------------|--------------|--------------|
| H | -2.804051000 | -1.900592000 | 0.377020000  |
| H | -0.819482000 | -1.757856000 | -2.575186000 |
| H | -1.756619000 | -0.451421000 | -3.312832000 |
| H | 4.879685000  | -0.960103000 | 2.210914000  |
| H | 4.172397000  | -2.146914000 | -1.711572000 |
| H | 3.474538000  | -1.269639000 | -3.079038000 |
| H | 5.106982000  | -0.858091000 | -2.503428000 |
| H | 3.276061000  | 2.437587000  | -1.316463000 |
| H | 4.625042000  | 1.741263000  | -2.250002000 |
| H | 2.952166000  | 1.596528000  | -2.843074000 |
| H | 2.868981000  | -0.528791000 | 4.045517000  |
| H | 2.680450000  | 0.914868000  | 3.015642000  |
| H | 1.255564000  | -0.027250000 | 3.479352000  |
| H | 1.213519000  | -2.894023000 | 2.707355000  |
| H | 2.417252000  | -3.526590000 | 1.572534000  |
| H | 2.921887000  | -2.999408000 | 3.194496000  |
| C | -0.445785000 | 3.109047000  | -0.732056000 |
| O | -0.463781000 | 4.099893000  | -1.286958000 |
| N | -2.332630000 | -0.987748000 | -1.411241000 |
| H | 5.573274000  | 0.113079000  | -0.022419000 |
| H | 4.527883000  | -1.993874000 | 0.830768000  |
| C | -3.244224000 | 0.139262000  | -1.256395000 |
| H | -2.765815000 | 0.996898000  | -0.767703000 |
| H | -3.521892000 | 0.460041000  | -2.263995000 |
| C | -4.481542000 | -0.238678000 | -0.483267000 |
| C | -4.753571000 | 0.342702000  | 0.749655000  |
| C | -5.364390000 | -1.190408000 | -0.990105000 |
| C | -5.891235000 | -0.013678000 | 1.466140000  |
| H | -4.065035000 | 1.076883000  | 1.153347000  |
| C | -6.499339000 | -1.549615000 | -0.279324000 |
| H | -5.150504000 | -1.652159000 | -1.947192000 |
| C | -6.765609000 | -0.960486000 | 0.952905000  |
| H | -6.089872000 | 0.446112000  | 2.425786000  |
| H | -7.179768000 | -2.287634000 | -0.684768000 |
| H | -7.651279000 | -1.240615000 | 1.508532000  |

**[2-adtH(a)]<sup>+</sup>**, T. E. = -5102.371567

|    |             |              |              |
|----|-------------|--------------|--------------|
| C  | 2.302604000 | 0.006158000  | 3.206146000  |
| P  | 2.494566000 | -1.054045000 | 1.740843000  |
| C  | 4.284128000 | -0.968576000 | 1.322160000  |
| C  | 4.547023000 | 0.185506000  | 0.349839000  |
| P  | 3.380684000 | 0.081050000  | -1.064827000 |
| Fe | 1.292145000 | -0.465580000 | -0.174412000 |
| C  | 1.399485000 | -2.208774000 | -0.832813000 |

|    |              |              |              |
|----|--------------|--------------|--------------|
| O  | 1.455332000  | -3.257889000 | -1.238170000 |
| C  | 4.141346000  | -1.150735000 | -2.171104000 |
| C  | 3.590416000  | 1.632978000  | -1.983996000 |
| S  | 0.048864000  | 0.427710000  | -2.021971000 |
| Fe | -0.390130000 | 1.505130000  | 0.123493000  |
| C  | -1.061730000 | 2.155887000  | 1.697048000  |
| O  | -1.472391000 | 2.533241000  | 2.681604000  |
| S  | -0.828424000 | -0.773095000 | 0.906223000  |
| C  | -1.851048000 | -1.733746000 | -0.222776000 |
| C  | -1.209863000 | -0.781244000 | -2.477279000 |
| C  | 1.317205000  | 1.681422000  | 0.544614000  |
| O  | 2.157289000  | 2.382015000  | 0.952501000  |
| C  | 2.266945000  | -2.726817000 | 2.416581000  |
| H  | 4.365852000  | 1.146330000  | 0.836134000  |
| H  | -1.328999000 | -2.631828000 | -0.549596000 |
| H  | -2.755708000 | -2.032453000 | 0.301026000  |
| H  | -0.748023000 | -1.746324000 | -2.680333000 |
| H  | -1.706834000 | -0.437575000 | -3.381676000 |
| H  | 4.881027000  | -0.871954000 | 2.230388000  |
| H  | 4.220655000  | -2.114218000 | -1.666942000 |
| H  | 3.513316000  | -1.273123000 | -3.054460000 |
| H  | 5.135332000  | -0.825814000 | -2.478558000 |
| H  | 3.278993000  | 2.472875000  | -1.365757000 |
| H  | 4.632341000  | 1.760956000  | -2.277854000 |
| H  | 2.965576000  | 1.597873000  | -2.876762000 |
| H  | 2.879185000  | -0.396337000 | 4.038897000  |
| H  | 2.641754000  | 1.015028000  | 2.978309000  |
| H  | 1.247763000  | 0.045473000  | 3.481969000  |
| H  | 1.238609000  | -2.827043000 | 2.764285000  |
| H  | 2.449316000  | -3.470912000 | 1.641558000  |
| H  | 2.947940000  | -2.900938000 | 3.249822000  |
| C  | -0.680679000 | 3.094104000  | -0.700416000 |
| O  | -0.823150000 | 4.080864000  | -1.240090000 |
| N  | -2.316566000 | -1.062112000 | -1.491204000 |
| H  | 5.577162000  | 0.179112000  | -0.010031000 |
| H  | 4.546720000  | -1.924785000 | 0.861684000  |
| C  | -3.241274000 | 0.115736000  | -1.289452000 |
| H  | -2.660539000 | 0.906542000  | -0.824861000 |
| H  | -3.528385000 | 0.431607000  | -2.291840000 |
| C  | -4.435913000 | -0.254592000 | -0.461188000 |
| C  | -4.473103000 | 0.060387000  | 0.894507000  |
| C  | -5.512812000 | -0.920258000 | -1.041014000 |
| C  | -5.573143000 | -0.292160000 | 1.663233000  |
| H  | -3.635215000 | 0.578918000  | 1.346046000  |
| C  | -6.611160000 | -1.276535000 | -0.271708000 |
| H  | -5.498910000 | -1.149884000 | -2.100830000 |

|   |              |              |              |
|---|--------------|--------------|--------------|
| C | -6.640978000 | -0.962997000 | 1.081186000  |
| H | -5.596988000 | -0.041301000 | 2.715362000  |
| H | -7.446330000 | -1.789625000 | -0.729540000 |
| H | -7.499528000 | -1.236104000 | 1.680462000  |
| H | -2.889623000 | -1.777228000 | -1.951045000 |

[2-*adt*H(b)]<sup>+</sup>, T. E. = -5102.378507

|    |              |              |              |
|----|--------------|--------------|--------------|
| C  | -3.506098000 | 2.166662000  | -0.998653000 |
| P  | -3.369229000 | 0.353437000  | -1.057634000 |
| C  | -4.750375000 | -0.250732000 | -0.003234000 |
| C  | -4.298448000 | -0.365581000 | 1.455832000  |
| P  | -2.718361000 | -1.298474000 | 1.535185000  |
| Fe | -1.363582000 | -0.504954000 | -0.221473000 |
| C  | -1.510630000 | -2.116260000 | -1.149756000 |
| O  | -1.553055000 | -3.075273000 | -1.736830000 |
| C  | -3.238335000 | -3.037481000 | 1.356361000  |
| C  | -2.192605000 | -1.235961000 | 3.273613000  |
| S  | 0.642338000  | -0.877730000 | 0.956326000  |
| Fe | 0.269730000  | 1.447985000  | 0.363116000  |
| C  | -0.064630000 | 3.139297000  | -0.321816000 |
| O  | -0.272645000 | 4.158329000  | -0.760466000 |
| S  | -0.091756000 | 0.572935000  | -1.879825000 |
| C  | 1.333779000  | -0.443482000 | -2.318648000 |
| C  | 1.951958000  | -1.484469000 | -0.129353000 |
| C  | -1.123343000 | 1.545333000  | 1.431925000  |
| O  | -1.913852000 | 1.855994000  | 2.214625000  |
| C  | -3.883060000 | -0.045945000 | -2.754360000 |
| H  | -4.105855000 | 0.622539000  | 1.879330000  |
| H  | 1.052081000  | -1.460336000 | -2.587730000 |
| H  | 1.829019000  | 0.022121000  | -3.166758000 |
| H  | 1.670344000  | -2.420781000 | -0.608861000 |
| H  | 2.836881000  | -1.648240000 | 0.479723000  |
| H  | -5.614793000 | 0.407500000  | -0.104033000 |
| H  | -3.719366000 | -3.198432000 | 0.391363000  |
| H  | -2.357923000 | -3.678741000 | 1.412919000  |
| H  | -3.932103000 | -3.311425000 | 2.151180000  |
| H  | -1.963561000 | -0.213349000 | 3.563981000  |
| H  | -2.979984000 | -1.630516000 | 3.916096000  |
| H  | -1.295589000 | -1.845222000 | 3.387049000  |
| H  | -4.477335000 | 2.488497000  | -1.375150000 |
| H  | -3.378705000 | 2.515100000  | 0.025997000  |
| H  | -2.718823000 | 2.599761000  | -1.617011000 |
| H  | -3.151303000 | 0.367349000  | -3.448712000 |
| H  | -3.917919000 | -1.127259000 | -2.885478000 |

|   |              |              |              |
|---|--------------|--------------|--------------|
| H | -4.864815000 | 0.376046000  | -2.969558000 |
| C | 1.751727000  | 2.001534000  | 1.234202000  |
| O | 2.616655000  | 2.336093000  | 1.892844000  |
| N | 2.358710000  | -0.547601000 | -1.228053000 |
| H | -5.057864000 | -0.850900000 | 2.071290000  |
| H | -5.041673000 | -1.229859000 | -0.391150000 |
| C | 3.715039000  | -0.914240000 | -1.788315000 |
| H | 3.641635000  | -1.942622000 | -2.139079000 |
| C | 4.801363000  | -0.737072000 | -0.767681000 |
| C | 5.423713000  | -1.839663000 | -0.191703000 |
| C | 5.186716000  | 0.546474000  | -0.386854000 |
| C | 6.419053000  | -1.661716000 | 0.759434000  |
| H | 5.129209000  | -2.839393000 | -0.489013000 |
| C | 6.173714000  | 0.724294000  | 0.570787000  |
| H | 4.722631000  | 1.412755000  | -0.847047000 |
| C | 6.790956000  | -0.380724000 | 1.143992000  |
| H | 6.901425000  | -2.523522000 | 1.200956000  |
| H | 6.465972000  | 1.723887000  | 0.863417000  |
| H | 7.564731000  | -0.242244000 | 1.887442000  |
| H | 3.872405000  | -0.259939000 | -2.644067000 |
| H | 2.425213000  | 0.391156000  | -0.806745000 |

**TS1<sub>121</sub><sup>0</sup>**, T. E. = -5102.362919

|    |              |              |              |
|----|--------------|--------------|--------------|
| C  | -3.479516000 | 2.517369000  | -0.551577000 |
| P  | -3.453733000 | 0.723896000  | -0.855382000 |
| C  | -4.794494000 | 0.048704000  | 0.206429000  |
| C  | -4.245776000 | -0.259275000 | 1.602543000  |
| P  | -2.730812000 | -1.289458000 | 1.459572000  |
| Fe | -1.477753000 | -0.426748000 | -0.330782000 |
| C  | -1.895992000 | -1.835828000 | -1.487334000 |
| O  | -2.087113000 | -2.683430000 | -2.199752000 |
| C  | -3.349584000 | -2.985145000 | 1.230814000  |
| C  | -2.020615000 | -1.331071000 | 3.130512000  |
| S  | 0.503962000  | -1.261791000 | 0.540675000  |
| Fe | 0.612149000  | 1.136602000  | 0.487779000  |
| C  | 1.262640000  | 2.767419000  | -0.037273000 |
| O  | 1.698482000  | 3.738055000  | -0.420336000 |
| S  | -0.245178000 | 0.926129000  | -1.748818000 |
| C  | 1.160590000  | 0.018640000  | -2.498694000 |
| C  | 1.719315000  | -1.617347000 | -0.783688000 |
| C  | 1.855139000  | 0.986794000  | 1.829292000  |
| O  | 2.642086000  | 0.846996000  | 2.627925000  |
| C  | -4.079006000 | 0.578278000  | -2.554187000 |
| H  | -3.955491000 | 0.663241000  | 2.112718000  |

|   |              |              |              |
|---|--------------|--------------|--------------|
| H | 0.773057000  | -0.825852000 | -3.069633000 |
| H | 1.649710000  | 0.711119000  | -3.179202000 |
| H | 1.299162000  | -2.354545000 | -1.469005000 |
| H | 2.590674000  | -2.043825000 | -0.293516000 |
| H | -5.631555000 | 0.747232000  | 0.248885000  |
| H | -3.935285000 | -3.054247000 | 0.314261000  |
| H | -2.498163000 | -3.661905000 | 1.149576000  |
| H | -3.968766000 | -3.283761000 | 2.076455000  |
| H | -1.709829000 | -0.332413000 | 3.433111000  |
| H | -2.753571000 | -1.712354000 | 3.841814000  |
| H | -1.147996000 | -1.984354000 | 3.124882000  |
| H | -4.412215000 | 2.943525000  | -0.920912000 |
| H | -3.391080000 | 2.718644000  | 0.514656000  |
| H | -2.638404000 | 2.981669000  | -1.068088000 |
| H | -3.353331000 | 1.025674000  | -3.233574000 |
| H | -4.204976000 | -0.472187000 | -2.815200000 |
| H | -5.034995000 | 1.091686000  | -2.655649000 |
| C | -0.842329000 | 1.609415000  | 1.463058000  |
| O | -1.610133000 | 2.032419000  | 2.187603000  |
| N | 2.130018000  | -0.413922000 | -1.498889000 |
| H | -4.989033000 | -0.758732000 | 2.226056000  |
| H | -5.155762000 | -0.864769000 | -0.274030000 |
| H | 1.893933000  | 0.581844000  | -0.469058000 |
| C | 3.519913000  | -0.474279000 | -2.015205000 |
| H | 3.626435000  | -1.329528000 | -2.688780000 |
| H | 3.673207000  | 0.434881000  | -2.596638000 |
| C | 4.529402000  | -0.544091000 | -0.900703000 |
| C | 4.764980000  | 0.576907000  | -0.107480000 |
| C | 5.235674000  | -1.714736000 | -0.646662000 |
| C | 5.683991000  | 0.524276000  | 0.929309000  |
| H | 4.228944000  | 1.497552000  | -0.310743000 |
| C | 6.159498000  | -1.769768000 | 0.389658000  |
| H | 5.062254000  | -2.588409000 | -1.264407000 |
| C | 6.382240000  | -0.651193000 | 1.180211000  |
| H | 5.858398000  | 1.400382000  | 1.540151000  |
| H | 6.703938000  | -2.685799000 | 0.577823000  |
| H | 7.100957000  | -0.692254000 | 1.988138000  |

[2-*t*H]<sup>+</sup>, T. E. = -5102.379396

|   |             |              |              |
|---|-------------|--------------|--------------|
| C | 3.142396000 | -0.130398000 | 3.053981000  |
| P | 2.616074000 | -1.227224000 | 1.705391000  |
| C | 4.176719000 | -1.802717000 | 0.924557000  |
| C | 4.636902000 | -0.801314000 | -0.140698000 |
| P | 3.270427000 | -0.458043000 | -1.317465000 |

|    |              |              |              |
|----|--------------|--------------|--------------|
| Fe | 1.319133000  | -0.342672000 | -0.033421000 |
| C  | 0.917085000  | -2.131365000 | -0.533251000 |
| O  | 0.706035000  | -3.192903000 | -0.830939000 |
| C  | 3.330181000  | -1.806259000 | -2.532592000 |
| C  | 3.775428000  | 0.995349000  | -2.276079000 |
| S  | -0.038881000 | 0.463686000  | -1.845884000 |
| Fe | -0.321368000 | 1.854520000  | 0.052756000  |
| C  | -0.516029000 | 2.821560000  | 1.639591000  |
| O  | -0.767019000 | 3.396479000  | 2.572877000  |
| S  | -0.687955000 | -0.171018000 | 1.275614000  |
| C  | -1.953263000 | -1.218163000 | 0.381444000  |
| C  | -1.501735000 | -0.705702000 | -1.946941000 |
| C  | 2.029158000  | 1.363479000  | 0.505699000  |
| O  | 2.729122000  | 2.182057000  | 0.841455000  |
| C  | 1.925254000  | -2.658540000 | 2.577427000  |
| H  | 4.912682000  | 0.151141000  | 0.320218000  |
| H  | -1.522692000 | -2.212781000 | 0.271704000  |
| H  | -2.790128000 | -1.287443000 | 1.074181000  |
| H  | -1.083983000 | -1.699722000 | -2.107450000 |
| H  | -2.017883000 | -0.404341000 | -2.855174000 |
| H  | 4.942570000  | -1.950004000 | 1.687315000  |
| H  | 3.252340000  | -2.774182000 | -2.038722000 |
| H  | 2.496830000  | -1.694993000 | -3.227134000 |
| H  | 4.269025000  | -1.761341000 | -3.083701000 |
| H  | 3.885246000  | 1.865690000  | -1.630879000 |
| H  | 4.723039000  | 0.798532000  | -2.777561000 |
| H  | 3.006400000  | 1.200253000  | -3.021499000 |
| H  | 3.679950000  | -0.709888000 | 3.803977000  |
| H  | 3.794057000  | 0.656596000  | 2.677661000  |
| H  | 2.263490000  | 0.325811000  | 3.510527000  |
| H  | 1.026299000  | -2.338256000 | 3.103876000  |
| H  | 1.660673000  | -3.447948000 | 1.875271000  |
| H  | 2.651495000  | -3.041837000 | 3.294012000  |
| C  | 0.124768000  | 3.337033000  | -0.990934000 |
| O  | 0.270653000  | 4.227293000  | -1.662376000 |
| N  | -2.426075000 | -0.739919000 | -0.871048000 |
| H  | 5.513344000  | -1.166487000 | -0.677456000 |
| H  | 3.976988000  | -2.778754000 | 0.474355000  |
| C  | -3.463637000 | 0.278508000  | -0.803592000 |
| H  | -3.179258000 | 1.102496000  | -0.144143000 |
| H  | -3.576988000 | 0.700699000  | -1.804474000 |
| C  | -4.785740000 | -0.291865000 | -0.338956000 |
| C  | -5.542797000 | 0.381749000  | 0.612733000  |
| C  | -5.275339000 | -1.482867000 | -0.870562000 |
| C  | -6.773967000 | -0.117360000 | 1.023025000  |
| H  | -5.164386000 | 1.303801000  | 1.039226000  |



|   |              |              |              |
|---|--------------|--------------|--------------|
| C | -6.501954000 | -1.985108000 | -0.462735000 |
| H | -4.682115000 | -2.017187000 | -1.602967000 |
| C | -7.256148000 | -1.302010000 | 0.485701000  |
| H | -7.351273000 | 0.416669000  | 1.766826000  |
| H | -6.872699000 | -2.910682000 | -0.884479000 |
| H | -8.212382000 | -1.695357000 | 0.805486000  |
| H | -1.662187000 | 2.469744000  | -0.163977000 |

[2-*t*H]<sup>0</sup>, T. E. = -5102.518651

|    |              |              |              |
|----|--------------|--------------|--------------|
| C  | 3.230625000  | 0.216983000  | 2.880063000  |
| P  | 2.833988000  | -1.038939000 | 1.622769000  |
| C  | 4.451052000  | -1.413957000 | 0.823111000  |
| C  | 4.652437000  | -0.504496000 | -0.393599000 |
| P  | 3.161368000  | -0.568895000 | -1.467665000 |
| Fe | 1.329619000  | -0.481445000 | -0.054283000 |
| C  | 0.895383000  | -2.324294000 | -0.353422000 |
| O  | 0.641456000  | -3.404062000 | -0.554625000 |
| C  | 3.400844000  | -2.076090000 | -2.466349000 |
| C  | 3.411667000  | 0.754917000  | -2.688388000 |
| S  | -0.209582000 | 0.283721000  | -1.764177000 |
| Fe | -0.205247000 | 1.870607000  | 0.076956000  |
| C  | -0.277648000 | 2.947153000  | 1.577595000  |
| O  | -0.416081000 | 3.580488000  | 2.502789000  |
| S  | -0.474423000 | -0.092846000 | 1.516818000  |
| C  | -1.892365000 | -1.097890000 | 0.851082000  |
| C  | -1.733744000 | -0.771284000 | -1.565684000 |
| C  | 1.833761000  | 1.489064000  | 0.207957000  |
| O  | 2.796326000  | 2.144745000  | 0.342453000  |
| C  | 2.484816000  | -2.510252000 | 2.635886000  |
| H  | 4.758725000  | 0.536288000  | -0.077708000 |
| H  | -1.520795000 | -2.118669000 | 0.737958000  |
| H  | -2.653562000 | -1.105355000 | 1.630312000  |
| H  | -1.396810000 | -1.803219000 | -1.691198000 |
| H  | -2.377334000 | -0.525855000 | -2.408183000 |
| H  | 5.267763000  | -1.314568000 | 1.540185000  |
| H  | 3.441834000  | -2.952305000 | -1.818743000 |
| H  | 2.552189000  | -2.188534000 | -3.142358000 |
| H  | 4.320326000  | -2.016683000 | -3.048877000 |
| H  | 3.397201000  | 1.722184000  | -2.188294000 |
| H  | 4.361716000  | 0.626772000  | -3.207644000 |
| H  | 2.595165000  | 0.719652000  | -3.410012000 |
| H  | 3.897646000  | -0.198311000 | 3.635515000  |
| H  | 3.702929000  | 1.075544000  | 2.405932000  |
| H  | 2.304180000  | 0.546226000  | 3.353061000  |

|   |              |              |              |
|---|--------------|--------------|--------------|
| H | 1.573134000  | -2.329453000 | 3.205955000  |
| H | 2.327927000  | -3.375477000 | 1.991886000  |
| H | 3.306584000  | -2.715605000 | 3.322214000  |
| C | -0.020455000 | 3.249592000  | -1.139275000 |
| O | 0.002341000  | 4.071327000  | -1.914242000 |
| N | -2.488085000 | -0.663546000 | -0.365174000 |
| H | 5.546136000  | -0.776991000 | -0.957714000 |
| H | 4.415082000  | -2.461939000 | 0.513017000  |
| C | -3.548210000 | 0.311912000  | -0.265003000 |
| H | -3.370987000 | 0.982898000  | 0.579954000  |
| H | -3.528820000 | 0.953351000  | -1.148985000 |
| C | -4.930904000 | -0.302207000 | -0.123770000 |
| C | -6.010864000 | 0.528375000  | 0.174357000  |
| C | -5.161207000 | -1.661506000 | -0.294179000 |
| C | -7.292672000 | 0.013512000  | 0.291764000  |
| H | -5.840266000 | 1.590274000  | 0.316292000  |
| C | -6.445629000 | -2.182806000 | -0.173934000 |
| H | -4.324299000 | -2.310622000 | -0.519454000 |
| C | -7.514962000 | -1.348743000 | 0.117402000  |
| H | -8.119894000 | 0.672759000  | 0.522933000  |
| H | -6.608561000 | -3.244923000 | -0.308183000 |
| H | -8.514156000 | -1.754022000 | 0.211624000  |
| H | -1.700272000 | 2.308810000  | -0.026256000 |

[2-*t*H-*adt*H(a)]<sup>+</sup>, T. E. = -5102.941146

|    |              |              |              |
|----|--------------|--------------|--------------|
| C  | 2.341194000  | -0.139717000 | 3.259636000  |
| P  | 2.450932000  | -1.163071000 | 1.758859000  |
| C  | 4.241857000  | -1.193924000 | 1.335367000  |
| C  | 4.575943000  | -0.057907000 | 0.363289000  |
| P  | 3.399880000  | -0.074952000 | -1.047493000 |
| Fe | 1.292525000  | -0.444358000 | -0.134019000 |
| C  | 1.269271000  | -2.247530000 | -0.829045000 |
| O  | 1.295607000  | -3.289810000 | -1.252999000 |
| C  | 4.069731000  | -1.339383000 | -2.174766000 |
| C  | 3.713717000  | 1.471362000  | -1.948047000 |
| S  | 0.022749000  | 0.488096000  | -1.998234000 |
| Fe | -0.548135000 | 1.711333000  | 0.050260000  |
| C  | -0.989663000 | 2.470902000  | 1.697210000  |
| O  | -1.354156000 | 2.902556000  | 2.671138000  |
| S  | -0.888404000 | -0.538168000 | 0.953759000  |
| C  | -1.859518000 | -1.615120000 | -0.119876000 |
| C  | -1.175329000 | -0.792661000 | -2.434525000 |
| C  | 1.463283000  | 1.452718000  | 0.559158000  |
| O  | 2.265514000  | 2.165656000  | 1.021950000  |

|   |              |              |              |
|---|--------------|--------------|--------------|
| C | 2.102952000  | -2.833086000 | 2.390579000  |
| H | 4.462539000  | 0.911652000  | 0.853389000  |
| H | -1.300912000 | -2.527042000 | -0.323894000 |
| H | -2.776305000 | -1.889150000 | 0.395385000  |
| H | -0.655153000 | -1.734591000 | -2.600777000 |
| H | -1.668873000 | -0.507246000 | -3.361058000 |
| H | 4.847768000  | -1.137968000 | 2.241036000  |
| H | 4.084397000  | -2.312231000 | -1.683170000 |
| H | 3.428100000  | -1.405929000 | -3.054406000 |
| H | 5.081407000  | -1.080035000 | -2.486322000 |
| H | 3.439537000  | 2.323844000  | -1.328794000 |
| H | 4.766392000  | 1.545529000  | -2.221636000 |
| H | 3.104726000  | 1.479296000  | -2.852276000 |
| H | 2.880501000  | -0.615763000 | 4.078255000  |
| H | 2.762778000  | 0.845472000  | 3.069649000  |
| H | 1.291816000  | -0.025143000 | 3.535908000  |
| H | 1.063058000  | -2.874852000 | 2.715806000  |
| H | 2.254980000  | -3.570554000 | 1.602675000  |
| H | 2.753205000  | -3.069154000 | 3.232978000  |
| C | -0.229785000 | 3.347645000  | -0.794329000 |
| O | -0.118239000 | 4.320522000  | -1.349262000 |
| N | -2.294982000 | -1.111644000 | -1.473454000 |
| H | 5.602152000  | -0.130824000 | -0.000724000 |
| H | 4.440242000  | -2.163893000 | 0.872054000  |
| C | -3.353969000 | -0.030765000 | -1.461920000 |
| H | -2.856243000 | 0.885169000  | -1.160274000 |
| H | -3.678667000 | 0.054537000  | -2.498159000 |
| C | -4.498672000 | -0.367361000 | -0.554307000 |
| C | -4.540405000 | 0.160394000  | 0.734189000  |
| C | -5.518802000 | -1.212376000 | -0.983877000 |
| C | -5.587732000 | -0.160995000 | 1.585887000  |
| H | -3.745930000 | 0.820751000  | 1.062859000  |
| C | -6.564177000 | -1.536593000 | -0.130630000 |
| H | -5.502646000 | -1.610995000 | -1.992375000 |
| C | -6.597825000 | -1.011899000 | 1.155158000  |
| H | -5.616159000 | 0.253866000  | 2.584784000  |
| H | -7.355293000 | -2.191247000 | -0.471417000 |
| H | -7.414987000 | -1.261303000 | 1.819285000  |
| H | -2.021928000 | 2.153457000  | -0.226978000 |
| H | -2.753682000 | -1.927605000 | -1.890287000 |

[2-*t*H-*adt*H(b)]<sup>+</sup>, T. E. = -5102.959881

|   |             |              |             |
|---|-------------|--------------|-------------|
| C | 3.347950000 | -0.486163000 | 2.637507000 |
| P | 2.354715000 | -1.577333000 | 1.572364000 |

|    |              |              |              |
|----|--------------|--------------|--------------|
| C  | 3.587189000  | -2.600343000 | 0.667273000  |
| C  | 3.973287000  | -1.912071000 | -0.645349000 |
| P  | 2.456151000  | -1.460183000 | -1.574848000 |
| Fe | 0.977378000  | -0.562400000 | -0.018759000 |
| C  | -0.190853000 | -2.099504000 | -0.082787000 |
| O  | -0.896935000 | -2.973072000 | -0.130351000 |
| C  | 1.956322000  | -3.001813000 | -2.405282000 |
| C  | 3.036486000  | -0.426625000 | -2.951686000 |
| S  | -0.296928000 | 0.669432000  | -1.651839000 |
| Fe | 0.494703000  | 2.239445000  | 0.036357000  |
| C  | 1.065090000  | 3.338016000  | 1.459185000  |
| O  | 1.333227000  | 3.993853000  | 2.331583000  |
| S  | -0.311517000 | 0.599759000  | 1.647963000  |
| C  | -2.065914000 | 0.433462000  | 1.241741000  |
| C  | -2.054011000 | 0.485690000  | -1.264746000 |
| C  | 2.233344000  | 1.093353000  | -0.003792000 |
| O  | 3.376407000  | 1.328037000  | -0.037000000 |
| C  | 1.595572000  | -2.722239000 | 2.763415000  |
| H  | 4.507130000  | -0.979321000 | -0.446613000 |
| H  | -2.357056000 | -0.610057000 | 1.130135000  |
| H  | -2.637021000 | 0.868636000  | 2.058769000  |
| H  | -2.344664000 | -0.561647000 | -1.198025000 |
| H  | -2.618187000 | 0.954046000  | -2.068113000 |
| H  | 4.460065000  | -2.789819000 | 1.294023000  |
| H  | 1.729862000  | -3.771201000 | -1.667021000 |
| H  | 1.056319000  | -2.811420000 | -2.991336000 |
| H  | 2.746858000  | -3.358659000 | -3.065049000 |
| H  | 3.465452000  | 0.496803000  | -2.565397000 |
| H  | 3.787157000  | -0.958913000 | -3.536110000 |
| H  | 2.187922000  | -0.182490000 | -3.591223000 |
| H  | 3.884542000  | -1.072985000 | 3.382476000  |
| H  | 4.058981000  | 0.074298000  | 2.033041000  |
| H  | 2.685777000  | 0.219473000  | 3.141599000  |
| H  | 0.896425000  | -2.166280000 | 3.388472000  |
| H  | 1.049204000  | -3.502048000 | 2.233598000  |
| H  | 2.357175000  | -3.181349000 | 3.393904000  |
| C  | 1.067997000  | 3.406454000  | -1.330085000 |
| O  | 1.339360000  | 4.103750000  | -2.168604000 |
| N  | -2.483249000 | 1.157487000  | 0.001041000  |
| H  | 4.620111000  | -2.543796000 | -1.256441000 |
| H  | 3.113769000  | -3.565358000 | 0.467454000  |
| C  | -3.962322000 | 1.461806000  | 0.001507000  |
| H  | -4.142912000 | 2.061680000  | 0.891745000  |
| H  | -4.140299000 | 2.080750000  | -0.876095000 |
| C  | -4.820497000 | 0.227335000  | -0.012797000 |
| C  | -5.237426000 | -0.355202000 | 1.181825000  |

|   |              |              |              |
|---|--------------|--------------|--------------|
| C | -5.217053000 | -0.342084000 | -1.220623000 |
| C | -6.018564000 | -1.501836000 | 1.169716000  |
| H | -4.960500000 | 0.095353000  | 2.127675000  |
| C | -5.997866000 | -1.488898000 | -1.234339000 |
| H | -4.924662000 | 0.119039000  | -2.156565000 |
| C | -6.395286000 | -2.072724000 | -0.038742000 |
| H | -6.338997000 | -1.944068000 | 2.103620000  |
| H | -6.302186000 | -1.921002000 | -2.178321000 |
| H | -7.007662000 | -2.964755000 | -0.048845000 |
| H | -0.828254000 | 3.152431000  | 0.053751000  |
| H | -1.960730000 | 2.072522000  | 0.022664000  |

TS2<sub>12</sub><sup>0</sup>, T. E. = -5102.957615

|    |              |              |              |
|----|--------------|--------------|--------------|
| C  | 3.375366000  | -0.269985000 | 2.640637000  |
| P  | 2.482636000  | -1.452696000 | 1.583770000  |
| C  | 3.808725000  | -2.370701000 | 0.699634000  |
| C  | 4.141911000  | -1.664573000 | -0.618095000 |
| P  | 2.599580000  | -1.346639000 | -1.562085000 |
| Fe | 1.037461000  | -0.556949000 | -0.021712000 |
| C  | -0.034939000 | -2.162147000 | -0.103410000 |
| O  | -0.706260000 | -3.060061000 | -0.172272000 |
| C  | 2.229155000  | -2.930415000 | -2.379811000 |
| C  | 3.103700000  | -0.277799000 | -2.941263000 |
| S  | -0.311789000 | 0.550391000  | -1.671864000 |
| Fe | 0.325173000  | 2.153538000  | 0.029449000  |
| C  | 0.858613000  | 3.267940000  | 1.492596000  |
| O  | 1.147553000  | 3.886115000  | 2.382085000  |
| S  | -0.340415000 | 0.477471000  | 1.644516000  |
| C  | -2.095231000 | 0.255960000  | 1.199359000  |
| C  | -2.072279000 | 0.304864000  | -1.259598000 |
| C  | 2.161040000  | 1.205089000  | -0.003406000 |
| O  | 3.263790000  | 1.574033000  | -0.034771000 |
| C  | 1.806186000  | -2.641400000 | 2.780310000  |
| H  | 4.597079000  | -0.689434000 | -0.425979000 |
| H  | -2.325317000 | -0.807745000 | 1.106896000  |
| H  | -2.676024000 | 0.661230000  | 2.024907000  |
| H  | -2.298021000 | -0.762451000 | -1.209882000 |
| H  | -2.642152000 | 0.738134000  | -2.078470000 |
| H  | 4.689847000  | -2.468269000 | 1.335798000  |
| H  | 2.055972000  | -3.706953000 | -1.634600000 |
| H  | 1.323160000  | -2.816616000 | -2.976188000 |
| H  | 3.052359000  | -3.231454000 | -3.027652000 |
| H  | 3.454271000  | 0.679508000  | -2.557928000 |
| H  | 3.899452000  | -0.750325000 | -3.517181000 |

|   |              |              |              |
|---|--------------|--------------|--------------|
| H | 2.242312000  | -0.106728000 | -3.587254000 |
| H | 3.957146000  | -0.802055000 | 3.393079000  |
| H | 4.041477000  | 0.339651000  | 2.032284000  |
| H | 2.656512000  | 0.385232000  | 3.134811000  |
| H | 1.054232000  | -2.136621000 | 3.387226000  |
| H | 1.334775000  | -3.471757000 | 2.255589000  |
| H | 2.594422000  | -3.026223000 | 3.427248000  |
| C | 0.881623000  | 3.352491000  | -1.358859000 |
| O | 1.189580000  | 4.023350000  | -2.202418000 |
| N | -2.491260000 | 0.972985000  | -0.020148000 |
| H | 4.842832000  | -2.245194000 | -1.219794000 |
| H | 3.432037000  | -3.378885000 | 0.510632000  |
| H | -1.210110000 | 2.930589000  | 0.037335000  |
| H | -1.755937000 | 2.103963000  | 0.011079000  |
| C | -3.928697000 | 1.351761000  | -0.022737000 |
| H | -4.086492000 | 1.971780000  | 0.860188000  |
| H | -4.083468000 | 1.974414000  | -0.904169000 |
| C | -4.873605000 | 0.176628000  | -0.023117000 |
| C | -5.343506000 | -0.352215000 | 1.176731000  |
| C | -5.279034000 | -0.406865000 | -1.221481000 |
| C | -6.187686000 | -1.454194000 | 1.180865000  |
| H | -5.058585000 | 0.108592000  | 2.115510000  |
| C | -6.122467000 | -1.509131000 | -1.220530000 |
| H | -4.944164000 | 0.010597000  | -2.163875000 |
| C | -6.574804000 | -2.037328000 | -0.018360000 |
| H | -6.548578000 | -1.852059000 | 2.120254000  |
| H | -6.432598000 | -1.950163000 | -2.158752000 |
| H | -7.235809000 | -2.894093000 | -0.016722000 |

[2-H<sub>2</sub>]<sup>+</sup>, T. E. = -5102.984517

|    |              |              |              |
|----|--------------|--------------|--------------|
| C  | -3.484843000 | -1.156212000 | -2.496858000 |
| P  | -2.093068000 | -1.876655000 | -1.576049000 |
| C  | -2.812149000 | -3.285194000 | -0.638972000 |
| C  | -3.383353000 | -2.803355000 | 0.699240000  |
| P  | -2.130434000 | -1.802409000 | 1.596921000  |
| Fe | -1.010032000 | -0.512782000 | -0.005265000 |
| C  | 0.412656000  | -1.787723000 | 0.003028000  |
| O  | 1.217005000  | -2.571080000 | 0.007094000  |
| C  | -1.118725000 | -3.009928000 | 2.503048000  |
| C  | -3.026983000 | -0.936000000 | 2.914028000  |
| S  | 0.136286000  | 0.870089000  | 1.600091000  |
| Fe | -0.542989000 | 2.565511000  | -0.017227000 |
| C  | -1.359756000 | 3.549120000  | -1.391286000 |
| O  | -1.872790000 | 4.098460000  | -2.232377000 |

|   |              |              |              |
|---|--------------|--------------|--------------|
| S | 0.139331000  | 0.857382000  | -1.618720000 |
| C | 1.920347000  | 0.661977000  | -1.232990000 |
| C | 1.917794000  | 0.672086000  | 1.218218000  |
| C | -1.366044000 | 3.559413000  | 1.345870000  |
| O | -1.884126000 | 4.114764000  | 2.179892000  |
| C | -1.074677000 | -2.621923000 | -2.878549000 |
| H | -4.254533000 | -2.162967000 | 0.536670000  |
| H | 2.171393000  | -0.405289000 | -1.270369000 |
| H | 2.443058000  | 1.142992000  | -2.058917000 |
| H | 2.168946000  | -0.394768000 | 1.264893000  |
| H | 2.438847000  | 1.159775000  | 2.041295000  |
| H | -3.572419000 | -3.788185000 | -1.238415000 |
| H | -0.677086000 | -3.733572000 | 1.818717000  |
| H | -0.317127000 | -2.481605000 | 3.020427000  |
| H | -1.734038000 | -3.537667000 | 3.231408000  |
| H | -3.762007000 | -0.253855000 | 2.489123000  |
| H | -3.532368000 | -1.651234000 | 3.562369000  |
| H | -2.308140000 | -0.360913000 | 3.498464000  |
| H | -3.881132000 | -1.886780000 | -3.201508000 |
| H | -4.279378000 | -0.848986000 | -1.817890000 |
| H | -3.133608000 | -0.280539000 | -3.043980000 |
| H | -0.681354000 | -1.823056000 | -3.507218000 |
| H | -0.240001000 | -3.169222000 | -2.442618000 |
| H | -1.674363000 | -3.301705000 | -3.483630000 |
| C | -2.569752000 | 0.620157000  | -0.010333000 |
| O | -3.561113000 | 1.149794000  | -0.005374000 |
| N | 2.354143000  | 1.301052000  | -0.009497000 |
| H | -3.710095000 | -3.641399000 | 1.316890000  |
| H | -2.003500000 | -4.002371000 | -0.474441000 |
| H | 0.994770000  | 4.073492000  | -0.020111000 |
| H | 1.396714000  | 3.432783000  | -0.018077000 |
| C | 3.798860000  | 1.579151000  | -0.008358000 |
| H | 4.014063000  | 2.179699000  | -0.893923000 |
| H | 4.009862000  | 2.193719000  | 0.868651000  |
| C | 4.676641000  | 0.346001000  | 0.004098000  |
| C | 5.068442000  | -0.259864000 | -1.187843000 |
| C | 5.071154000  | -0.232361000 | 1.208636000  |
| C | 5.824746000  | -1.424356000 | -1.177992000 |
| H | 4.786108000  | 0.189813000  | -2.133366000 |
| C | 5.827565000  | -1.396693000 | 1.224123000  |
| H | 4.790371000  | 0.239004000  | 2.143978000  |
| C | 6.202779000  | -1.997557000 | 0.029392000  |
| H | 6.124456000  | -1.880660000 | -2.112649000 |
| H | 6.129403000  | -1.831210000 | 2.168422000  |
| H | 6.795345000  | -2.903108000 | 0.039176000  |

**HBF<sub>4</sub>.Et<sub>2</sub>O**, T. E. = -658.587330

|   |              |              |              |
|---|--------------|--------------|--------------|
| B | -1.943506000 | -0.156048000 | 0.076220000  |
| F | -2.262709000 | 1.181423000  | 0.171698000  |
| F | -3.052968000 | -0.954194000 | -0.038115000 |
| F | -1.141901000 | -0.327177000 | -1.140645000 |
| O | 1.246078000  | -0.180837000 | -0.769749000 |
| C | 1.587242000  | 1.244603000  | -0.675399000 |
| C | 1.758041000  | -1.092343000 | 0.261421000  |
| C | 1.227271000  | 1.839074000  | 0.661671000  |
| C | 3.262842000  | -1.077634000 | 0.262151000  |
| F | -1.119252000 | -0.551133000 | 1.123557000  |
| H | 1.025210000  | 1.693173000  | -1.490975000 |
| H | 2.648095000  | 1.305290000  | -0.901706000 |
| H | 1.356934000  | -2.059239000 | -0.031612000 |
| H | 1.322336000  | -0.796700000 | 1.212553000  |
| H | 0.226982000  | -0.291148000 | -0.913541000 |
| H | 0.173740000  | 1.680830000  | 0.891017000  |
| H | 1.410886000  | 2.912033000  | 0.609701000  |
| H | 3.606241000  | -1.861472000 | 0.936255000  |
| H | 3.655272000  | -1.281736000 | -0.733237000 |
| H | 3.664300000  | -0.131329000 | 0.622941000  |
| H | 1.838004000  | 1.434767000  | 1.467974000  |

**BF<sub>4</sub><sup>-</sup>.Et<sub>2</sub>O**, T. E. = -658.167031

|   |              |              |              |
|---|--------------|--------------|--------------|
| B | 1.874766000  | -0.114335000 | -0.002906000 |
| F | 1.115728000  | -1.107307000 | -0.634867000 |
| F | 3.225123000  | -0.485610000 | -0.009702000 |
| F | 1.721643000  | 1.096631000  | -0.686042000 |
| O | -2.614261000 | 0.259679000  | 0.042897000  |
| C | -1.704409000 | 1.101241000  | -0.651454000 |
| C | -1.993576000 | -0.861475000 | 0.655129000  |
| C | -1.113145000 | 2.157435000  | 0.263209000  |
| C | -1.950407000 | -2.050359000 | -0.286563000 |
| F | 1.441753000  | 0.032397000  | 1.322020000  |
| H | -2.271163000 | 1.570163000  | -1.458326000 |
| H | -0.904050000 | 0.503880000  | -1.100307000 |
| H | -2.584706000 | -1.100070000 | 1.541726000  |
| H | -0.982056000 | -0.601099000 | 0.981708000  |
| H | -1.908797000 | 2.749655000  | 0.718027000  |
| H | -0.457195000 | 2.820159000  | -0.302075000 |
| H | -1.476718000 | -2.904122000 | 0.200717000  |
| H | -2.960141000 | -2.334150000 | -0.586564000 |
| H | -1.368748000 | -1.810034000 | -1.176541000 |
| H | -0.515157000 | 1.693818000  | 1.048386000  |



[Cp\*<sub>2</sub>Cr], T. E. = -1824.147249

|    |              |              |              |
|----|--------------|--------------|--------------|
| Cr | 0.001354000  | 0.014621000  | 0.000816000  |
| C  | -1.881662000 | -1.023302000 | 0.459420000  |
| C  | -1.865668000 | 0.173605000  | 1.230812000  |
| C  | -1.849104000 | -0.656741000 | -0.922677000 |
| C  | -1.822794000 | 1.276507000  | 0.337849000  |
| C  | -1.811478000 | 0.770896000  | -0.993258000 |
| C  | 1.881285000  | 0.329678000  | 1.108993000  |
| C  | 1.764851000  | -1.039813000 | 0.715697000  |
| C  | 1.952606000  | 1.121145000  | -0.072032000 |
| C  | 1.763902000  | -1.083548000 | -0.714023000 |
| C  | 1.880134000  | 0.252853000  | -1.193174000 |
| C  | -1.956808000 | -2.421238000 | 0.993841000  |
| H  | -2.990768000 | -2.771615000 | 1.054850000  |
| H  | -1.412790000 | -3.120106000 | 0.355985000  |
| H  | -1.527062000 | -2.488114000 | 1.993875000  |
| C  | -1.919648000 | -1.596673000 | -2.087920000 |
| H  | -2.953781000 | -1.787912000 | -2.387716000 |
| H  | -1.396351000 | -1.192553000 | -2.956007000 |
| H  | -1.463691000 | -2.558704000 | -1.850262000 |
| C  | -1.863783000 | 0.245241000  | 2.727647000  |
| H  | -1.400462000 | 1.166157000  | 3.082232000  |
| H  | -2.880039000 | 0.211458000  | 3.128694000  |
| H  | -1.312798000 | -0.589217000 | 3.164923000  |
| C  | -1.766802000 | 2.724056000  | 0.721635000  |
| H  | -1.192570000 | 3.304263000  | -0.001844000 |
| H  | -2.767305000 | 3.161241000  | 0.772390000  |
| H  | -1.298872000 | 2.860327000  | 1.697157000  |
| C  | -1.798070000 | 1.585052000  | -2.251595000 |
| H  | -2.811215000 | 1.774997000  | -2.616246000 |
| H  | -1.318780000 | 2.552131000  | -2.094641000 |
| H  | -1.254246000 | 1.075348000  | -3.048376000 |
| C  | 1.691385000  | -2.324385000 | -1.551107000 |
| H  | 2.681827000  | -2.760052000 | -1.708412000 |
| H  | 1.071035000  | -3.087007000 | -1.076834000 |
| H  | 1.262741000  | -2.118371000 | -2.532399000 |
| C  | 1.888650000  | 0.666015000  | -2.633505000 |
| H  | 1.491293000  | 1.673255000  | -2.761218000 |
| H  | 2.900961000  | 0.655131000  | -3.045595000 |
| H  | 1.280973000  | -0.005552000 | -3.242271000 |
| C  | 2.051643000  | 2.615771000  | -0.116523000 |
| H  | 1.532881000  | 3.072975000  | 0.727092000  |
| H  | 3.092696000  | 2.946788000  | -0.079911000 |
| H  | 1.611311000  | 3.017416000  | -1.029800000 |
| C  | 1.949303000  | 0.832075000  | 2.519454000  |

|   |             |              |             |
|---|-------------|--------------|-------------|
| H | 1.341764000 | 0.220874000  | 3.188627000 |
| H | 2.973851000 | 0.815469000  | 2.900949000 |
| H | 1.587759000 | 1.858326000  | 2.593583000 |
| C | 1.731389000 | -2.222622000 | 1.635571000 |
| H | 2.738459000 | -2.583926000 | 1.861832000 |
| H | 1.251662000 | -1.974732000 | 2.583736000 |
| H | 1.176646000 | -3.052486000 | 1.195831000 |

[Cp\*<sub>2</sub>Cr]<sup>+</sup>, T. E. = -1824.041132

|    |              |              |              |
|----|--------------|--------------|--------------|
| Cr | -0.000557000 | -0.009745000 | -0.001435000 |
| C  | -1.886502000 | -0.559503000 | 1.064842000  |
| C  | -1.881784000 | 0.848700000  | 0.844703000  |
| C  | -1.879211000 | -1.204135000 | -0.206629000 |
| C  | -1.869774000 | 1.075283000  | -0.561980000 |
| C  | -1.868031000 | -0.193262000 | -1.211590000 |
| C  | 1.861649000  | 1.088829000  | 0.555705000  |
| C  | 1.866898000  | -0.176747000 | 1.211118000  |
| C  | 1.876681000  | 0.855986000  | -0.849840000 |
| C  | 1.885046000  | -1.192169000 | 0.210803000  |
| C  | 1.889601000  | -0.553159000 | -1.063603000 |
| C  | -1.909587000 | -1.235635000 | 2.400170000  |
| H  | -2.939685000 | -1.402660000 | 2.721727000  |
| H  | -1.411726000 | -2.204115000 | 2.368050000  |
| H  | -1.419770000 | -0.629930000 | 3.161934000  |
| C  | -1.886942000 | -2.681091000 | -0.450959000 |
| H  | -2.908185000 | -3.032592000 | -0.611601000 |
| H  | -1.304785000 | -2.943205000 | -1.334243000 |
| H  | -1.477678000 | -3.227743000 | 0.397320000  |
| C  | -1.902337000 | 1.903053000  | 1.906612000  |
| H  | -1.434355000 | 2.825069000  | 1.564208000  |
| H  | -2.932084000 | 2.138059000  | 2.184328000  |
| H  | -1.385414000 | 1.574306000  | 2.807756000  |
| C  | -1.878866000 | 2.412195000  | -1.235022000 |
| H  | -1.424178000 | 2.364675000  | -2.223666000 |
| H  | -2.904817000 | 2.765322000  | -1.358328000 |
| H  | -1.341376000 | 3.158192000  | -0.649693000 |
| C  | -1.867733000 | -0.423137000 | -2.690571000 |
| H  | -2.888948000 | -0.403025000 | -3.076753000 |
| H  | -1.301385000 | 0.346027000  | -3.215607000 |
| H  | -1.437516000 | -1.391646000 | -2.942233000 |
| C  | 1.901249000  | -2.668006000 | 0.461450000  |
| H  | 2.925214000  | -3.014148000 | 0.616323000  |
| H  | 1.326537000  | -2.928963000 | 1.349877000  |
| H  | 1.488546000  | -3.220379000 | -0.381477000 |

|   |             |              |              |
|---|-------------|--------------|--------------|
| C | 1.917215000 | -1.234780000 | -2.396032000 |
| H | 1.417623000 | -0.638514000 | -3.158949000 |
| H | 2.948343000 | -1.390350000 | -2.720040000 |
| H | 1.431583000 | -2.209201000 | -2.358202000 |
| C | 1.893022000 | 1.905527000  | -1.916511000 |
| H | 1.417673000 | 2.825857000  | -1.579802000 |
| H | 2.921969000 | 2.146335000  | -2.192220000 |
| H | 1.381080000 | 1.569112000  | -2.817646000 |
| C | 1.861082000 | 2.428791000  | 1.222892000  |
| H | 1.400004000 | 2.383939000  | 2.208745000  |
| H | 2.884827000 | 2.786391000  | 1.351663000  |
| H | 1.324851000 | 3.170269000  | 0.630699000  |
| C | 1.868580000 | -0.398561000 | 2.691360000  |
| H | 2.889176000 | -0.361183000 | 3.077900000  |
| H | 1.290897000 | 0.365296000  | 3.211825000  |
| H | 1.452605000 | -1.371805000 | 2.948399000  |
